# Supplementary material for: Terpolymerization of ethylene, norbornene and dicyclopentadiene catalyzed by modified cyclopentadienyl scandium complexes
Source: Royal Society of Chemistry journal article supplement (doi:10.1039/d3py00383c), 2023-01-01
Supplement: d3py00383c1.pdf [file d3py00383c1.pdf]

## Terpolymerization of ethylene, norbornene and dicyclopentadiene catalyzed by modified cyclopentadienyl scandium complexes

Lin Feng Wang,<sup>a,b</sup> Shuqi Dong,<sup>a,b</sup> Hui Tian,<sup>a,b</sup> Guangbi Gong,<sup>c</sup> Baoli Wang,<sup>\*a,b</sup> Chunji Wu,<sup>\*a</sup> Dongmei Cui<sup>a,b</sup>

<sup>a</sup>State Key Laboratory of Polymer Physics and Chemistry, Changchun Institute of Applied Chemistry, Chinese Academy of Sciences, Changchun 130022, People's Republic of China.

<sup>b</sup>School of Applied Chemistry and Engineering, University of Science and Technology of China, Hefei 230026, People's Republic of China.

<sup>c</sup>Lanzhou Chemical Research Center, PetroChina Company Limited, Lanzhou 730060, People's Republic of China.

### Content

|                                                                                                                                                                         |   |
|-------------------------------------------------------------------------------------------------------------------------------------------------------------------------|---|
| <b>Fig. S1</b> <sup>13</sup> C NMR spectrum of ethylene/norbornene copolymer (Table 1, entry 1, C <sub>6</sub> D <sub>4</sub> Cl <sub>2</sub> , 110 °C, 400 MHz). ..... | 1 |
| <b>Fig. S2</b> <sup>13</sup> C NMR spectrum of ethylene/norbornene copolymer (Table 1, entry 2, C <sub>6</sub> D <sub>4</sub> Cl <sub>2</sub> , 110 °C, 400 MHz). ..... | 1 |
| <b>Fig. S3</b> <sup>13</sup> C NMR spectrum of ethylene/norbornene copolymer (Table 1, entry 3, C <sub>6</sub> D <sub>4</sub> Cl <sub>2</sub> , 110 °C, 400 MHz). ..... | 2 |
| <b>Fig. S4</b> <sup>13</sup> C NMR spectrum of ethylene/norbornene copolymer (Table 1, entry 4, C <sub>6</sub> D <sub>4</sub> Cl <sub>2</sub> , 110 °C, 400 MHz). ..... | 2 |
| <b>Fig. S5</b> <sup>13</sup> C NMR spectrum of ethylene/norbornene copolymer (Table 1, entry 5, C <sub>6</sub> D <sub>4</sub> Cl <sub>2</sub> , 110 °C, 400 MHz). ..... | 3 |
| <b>Fig. S6</b> <sup>13</sup> C NMR spectrum of ethylene/norbornene copolymer (Table 1, entry 6, C <sub>6</sub> D <sub>4</sub> Cl <sub>2</sub> , 110 °C, 400 MHz). ..... | 3 |
| <b>Fig. S7</b> <sup>1</sup> H NMR spectrum of ethylene/norbornene/dicyclopentadiene terpolymer (Table 1, entry 7, CDCl <sub>3</sub> , 25 °C, 500 MHz). .....            | 4 |
| <b>Fig. S8</b> <sup>1</sup> H NMR spectrum of ethylene/norbornene/dicyclopentadiene terpolymer (Table 1, entry 8, CDCl <sub>3</sub> , 25 °C, 500 MHz). .....            | 4 |
| <b>Fig. S9</b> <sup>1</sup> H NMR spectrum of ethylene/norbornene/dicyclopentadiene terpolymer (Table 1, entry 9, CDCl <sub>3</sub> , 25 °C, 500 MHz). .....            | 5 |
| <b>Fig. S10</b> <sup>1</sup> H NMR spectrum of ethylene/norbornene/dicyclopentadiene terpolymer (Table 1, entry 10, CDCl <sub>3</sub> , 25 °C, 500 MHz). .....          | 5 |
| <b>Fig. S11</b> <sup>1</sup> H NMR spectrum of ethylene/norbornene/dicyclopentadiene terpolymer (Table 1, entry 11, CDCl <sub>3</sub> , 25 °C, 500 MHz). .....          | 6 |
| <b>Fig. S12</b> <sup>1</sup> H NMR spectrum of ethylene/norbornene/dicyclopentadiene terpolymer (Table 1, entry 12, CDCl <sub>3</sub> , 25 °C, 500 MHz). .....          | 6 |
| <b>Fig. S13</b> <sup>1</sup> H NMR spectrum of ethylene/norbornene/dicyclopentadiene terpolymer (Table 1, entry 13, CDCl <sub>3</sub> , 25 °C, 500 MHz). .....          | 7 |
| <b>Fig. S14</b> <sup>1</sup> H NMR spectrum of ethylene/norbornene/dicyclopentadiene terpolymer (Table 1, entry 14, CDCl <sub>3</sub> , 25 °C, 500 MHz). .....          | 7 |

|                                                                                                                                                            |    |
|------------------------------------------------------------------------------------------------------------------------------------------------------------|----|
| <b>Fig. S15</b> $^1\text{H}$ NMR spectrum of ethylene/norbornene/dicyclopentadiene terpolymer (Table 1, entry 15, $\text{CDCl}_3$ , 25 °C, 500 MHz). ..... | 8  |
| <b>Fig. S16</b> $^1\text{H}$ NMR spectrum of ethylene/norbornene/dicyclopentadiene terpolymer (Table 1, entry 16, $\text{CDCl}_3$ , 25 °C, 500 MHz). ..... | 8  |
| <b>Fig. S17</b> $^1\text{H}$ NMR spectrum of ethylene/norbornene/dicyclopentadiene terpolymer (Table 1, entry 17, $\text{CDCl}_3$ , 25 °C, 500 MHz). ..... | 9  |
| <b>Fig. S18</b> GPC curve of ethylene/norbornene copolymer (Table 1, entry 1). .....                                                                       | 9  |
| <b>Fig. S19</b> GPC curve of ethylene/norbornene copolymer (Table 1, entry 2). .....                                                                       | 10 |
| <b>Fig. S20</b> GPC curve of ethylene/norbornene copolymer (Table 1, entry 3). .....                                                                       | 10 |
| <b>Fig. S21</b> GPC curve of ethylene/norbornene copolymer (Table 1, entry 4). .....                                                                       | 11 |
| <b>Fig. S22</b> GPC curve of ethylene/norbornene copolymer (Table 1, entry 5). .....                                                                       | 11 |
| <b>Fig. S23</b> GPC curve of ethylene/norbornene copolymer (Table 1, entry 6). .....                                                                       | 12 |
| <b>Fig. S24</b> GPC curve of ethylene/norbornene/dicyclopentadiene terpolymer (Table 1, entry 7). .....                                                    | 12 |
| <b>Fig. S25</b> GPC curve of ethylene/norbornene/dicyclopentadiene terpolymer (Table 1, entry 8). .....                                                    | 13 |
| <b>Fig. S26</b> GPC curve of ethylene/norbornene/dicyclopentadiene terpolymer (Table 1, entry 9). .....                                                    | 13 |
| <b>Fig. S27</b> GPC curve of ethylene/norbornene/dicyclopentadiene terpolymer (Table 1, entry 10). .....                                                   | 14 |
| <b>Fig. S28</b> GPC curve of ethylene/norbornene/dicyclopentadiene terpolymer (Table 1, entry 11). .....                                                   | 14 |
| <b>Fig. S29</b> GPC curve of ethylene/norbornene/dicyclopentadiene terpolymer (Table 1, entry 12). .....                                                   | 15 |
| <b>Fig. S30</b> GPC curve of ethylene/norbornene/dicyclopentadiene terpolymer (Table 1, entry 13). .....                                                   | 15 |
| <b>Fig. S31</b> GPC curve of ethylene/norbornene/dicyclopentadiene terpolymer (Table 1, entry 14). .....                                                   | 16 |
| <b>Fig. S32</b> GPC curve of ethylene/norbornene/dicyclopentadiene terpolymer (Table 1, entry 15). .....                                                   | 16 |
| <b>Fig. S33</b> GPC curve of ethylene/norbornene/dicyclopentadiene terpolymer (Table 1, entry 16). .....                                                   | 17 |
| <b>Fig. S34</b> GPC curve of ethylene/norbornene/dicyclopentadiene terpolymer (Table 1, entry 17). .....                                                   | 17 |
| <b>Fig. S35</b> DSC curve of the ethylene/norbornene copolymer (Table 1, entry 1). .....                                                                   | 18 |
| <b>Fig. S36</b> DSC curve of the ethylene/norbornene copolymer (Table 1, entry 2). .....                                                                   | 18 |
| <b>Fig. S37</b> DSC curve of the ethylene/norbornene copolymer (Table 1, entry 3). .....                                                                   | 19 |
| <b>Fig. S38</b> DSC curve of the ethylene/norbornene copolymer (Table 1, entry 4). .....                                                                   | 19 |
| <b>Fig. S39</b> DSC curve of the ethylene/norbornene copolymer (Table 1, entry 5). .....                                                                   | 20 |
| <b>Fig. S40</b> DSC curve of the ethylene/norbornene copolymer (Table 1, entry 6). .....                                                                   | 20 |
| <b>Fig. S41</b> DSC curve of the ethylene/norbornene/dicyclopentadiene terpolymer (Table 1, entry 7). .....                                                | 21 |
| <b>Fig. S42</b> DSC curve of the ethylene/norbornene/dicyclopentadiene terpolymer (Table 1, entry 8). .....                                                | 21 |

|                                                                                                                                                                                      |    |
|--------------------------------------------------------------------------------------------------------------------------------------------------------------------------------------|----|
| <b>Fig. S43</b> DSC curve of the ethylene/norbornene/dicyclopentadiene terpolymer (Table 1, entry 9).                                                                                | 22 |
| <b>Fig. S44</b> DSC curve of the ethylene/norbornene/dicyclopentadiene terpolymer (Table 1, entry 10).                                                                               | 22 |
| <b>Fig. S45</b> DSC curve of the ethylene/norbornene/dicyclopentadiene terpolymer (Table 1, entry 11).                                                                               | 23 |
| <b>Fig. S46</b> DSC curve of the ethylene/norbornene/dicyclopentadiene terpolymer (Table 1, entry 12).                                                                               | 23 |
| <b>Fig. S47</b> DSC curve of the ethylene/norbornene/dicyclopentadiene terpolymer (Table 1, entry 13).                                                                               | 24 |
| <b>Fig. S48</b> DSC curve of the ethylene/norbornene/dicyclopentadiene terpolymer (Table 1, entry 14).                                                                               | 24 |
| <b>Fig. S49</b> DSC curve of the ethylene/norbornene/dicyclopentadiene terpolymer (Table 1, entry 15).                                                                               | 25 |
| <b>Fig. S50</b> DSC curve of the ethylene/norbornene/dicyclopentadiene terpolymer (Table 1, entry 16).                                                                               | 25 |
| <b>Fig. S51</b> DSC curve of the ethylene/norbornene/dicyclopentadiene terpolymer (Table 1, entry 17).                                                                               | 26 |
| <b>Fig. S52</b> DSC curve of ethylene/norbornene/dicyclopentadiene hydroxylated terpolymer (Table 1, entry 17).                                                                      | 26 |
| <b>Fig. S53</b> <sup>1</sup> H NMR spectrum of ethylene/norbornene/dicyclopentadiene terpolymer (Table 1, entry 15, CDCl <sub>3</sub> , 25 °C, 500 MHz).                             | 27 |
| <b>Fig. S54</b> <sup>1</sup> H- <sup>1</sup> H COSY spectrum of ethylene/norbornene/dicyclopentadiene terpolymer (Table 1, entry 15, CDCl <sub>3</sub> , 25 °C, 500 MHz).            | 27 |
| <b>Fig. S55</b> <sup>1</sup> H- <sup>13</sup> C HSQC NMR spectrum of ethylene/norbornene/dicyclopentadiene terpolymer (Table 1, entry 15, CDCl <sub>3</sub> , 25 °C, 500 MHz).       | 28 |
| <b>Fig. S56</b> <sup>1</sup> H- <sup>13</sup> C HMBC NMR spectrum of ethylene/norbornene/dicyclopentadiene terpolymer (Table 1, entry 15, CDCl <sub>3</sub> , 25 °C, 500 MHz).       | 29 |
| <b>Fig. S57</b> <sup>1</sup> H spectrum of the product of ethylene/norbornene/dicyclopentadiene terpolymer (Table 1, entry 17) via epoxidation (CDCl <sub>3</sub> , 25 °C, 500 MHz). | 29 |
| <b>Fig. S58</b> <sup>1</sup> H spectrum of hydroxylated ethylene/norbornene/dicyclopentadiene terpolymer (Table 1, entry 17) (CDCl <sub>3</sub> , 25 °C, 500 MHz).                   | 30 |
| <b>Fig. S59</b> IR spectra of terpolymer (down, entry 17 in Table 1) and the corresponding hydroxylated product (up).                                                                | 30 |
| <b>Fig. S60</b> DSC curves of terpolymer (down, entry 17 in Table 1) and the corresponding hydroxylated product (up).                                                                | 31 |
| <b>Fig. S61</b> Water contact angle of terpolymer (left, entry 17 in Table 1) and the corresponding hydroxylated product (right).                                                    | 31 |

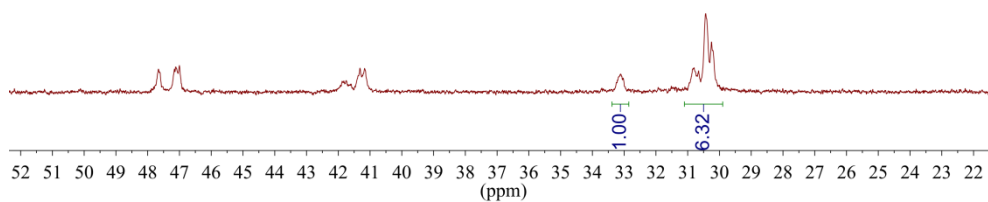

**Fig. S1** <sup>13</sup>C NMR spectrum of ethylene/norbornene copolymer (Table 1, entry 1, C<sub>6</sub>D<sub>4</sub>Cl<sub>2</sub>, 110 °C, 400 MHz).

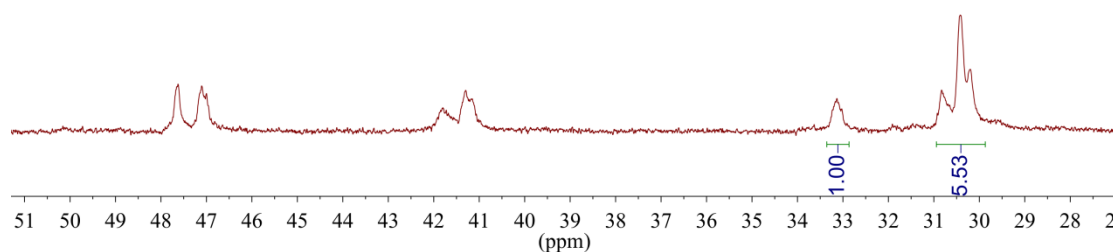

**Fig. S2** <sup>13</sup>C NMR spectrum of ethylene/norbornene copolymer (Table 1, entry 2, C<sub>6</sub>D<sub>4</sub>Cl<sub>2</sub>, 110 °C, 400 MHz).

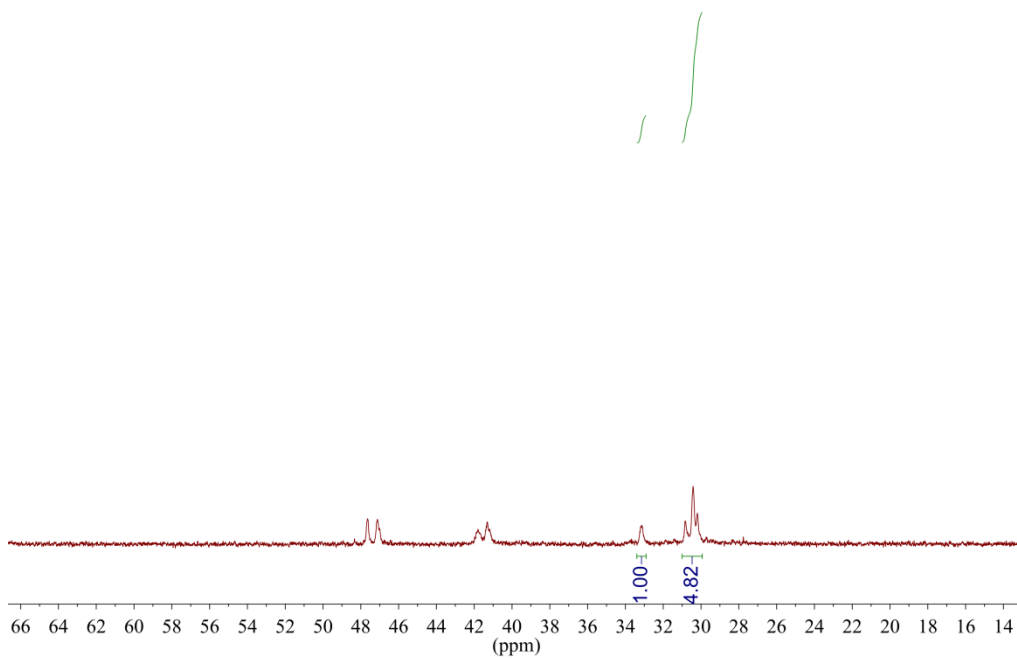

**Fig. S3**  $^{13}\text{C}$  NMR spectrum of ethylene/norbornene copolymer (Table 1, entry 3,  $\text{C}_6\text{D}_4\text{Cl}_2$ , 110  $^\circ\text{C}$ , 400 MHz).

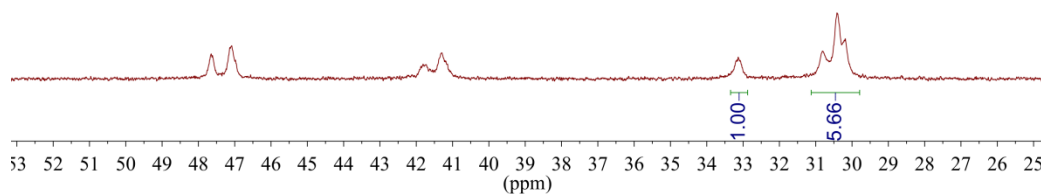

**Fig. S4**  $^{13}\text{C}$  NMR spectrum of ethylene/norbornene copolymer (Table 1, entry 4,  $\text{C}_6\text{D}_4\text{Cl}_2$ , 110  $^\circ\text{C}$ , 400 MHz).

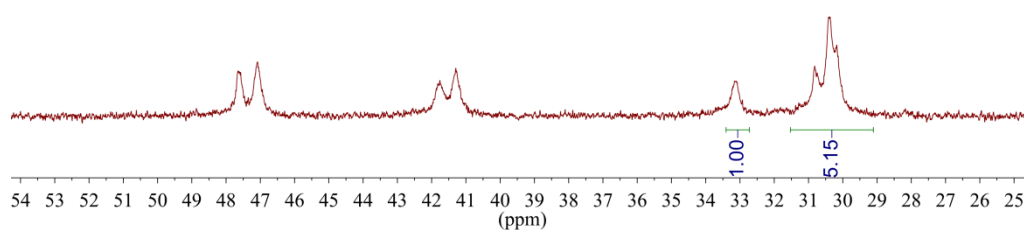

**Fig. S5** <sup>13</sup>C NMR spectrum of ethylene/norbornene copolymer (Table 1, entry 5, C<sub>6</sub>D<sub>4</sub>Cl<sub>2</sub>, 110 °C, 400 MHz).

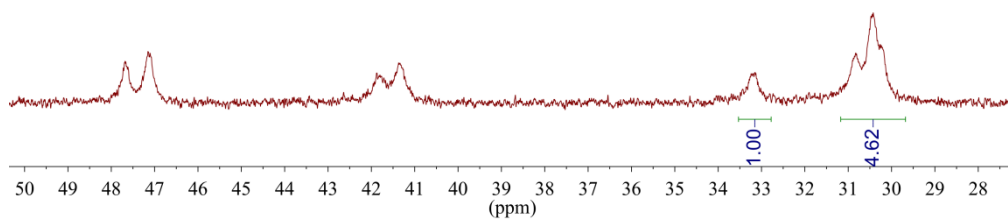

**Fig. S6** <sup>13</sup>C NMR spectrum of ethylene/norbornene copolymer (Table 1, entry 6, C<sub>6</sub>D<sub>4</sub>Cl<sub>2</sub>, 110 °C, 400 MHz).

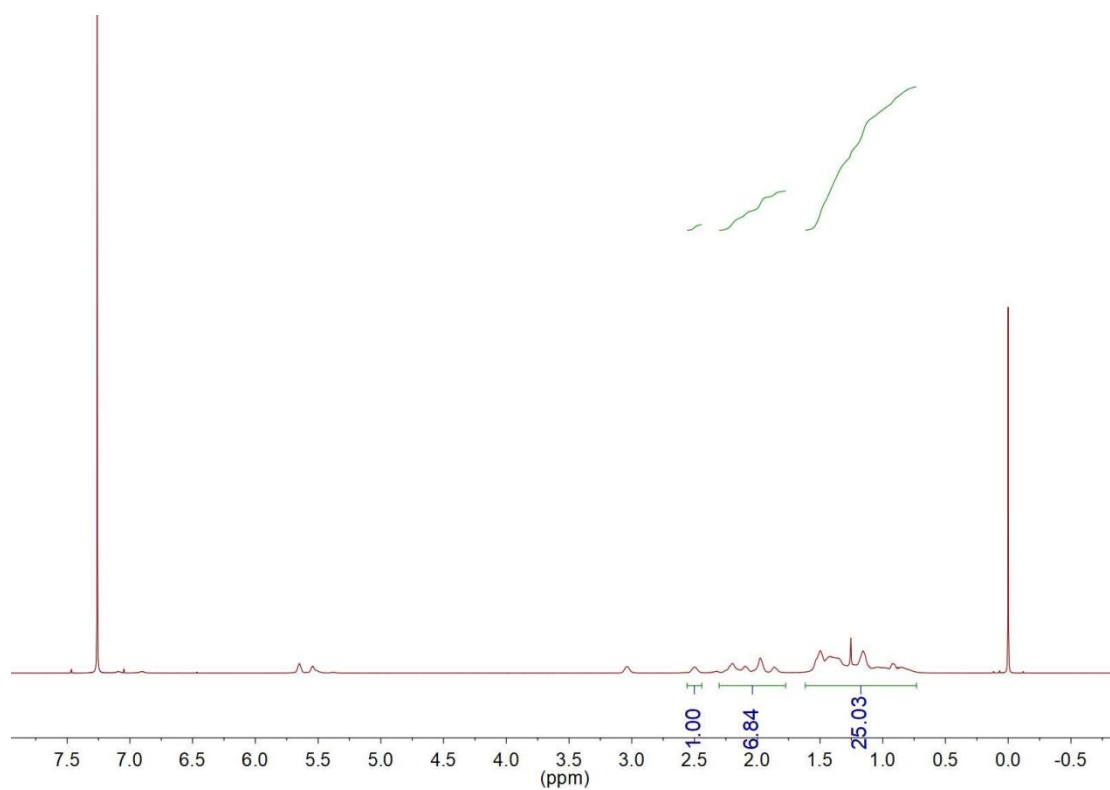

**Fig. S7**  $^1\text{H}$  NMR spectrum of ethylene/norbornene/dicyclopentadiene terpolymer (Table 1, entry 7,  $\text{CDCl}_3$ , 25  $^\circ\text{C}$ , 500 MHz).

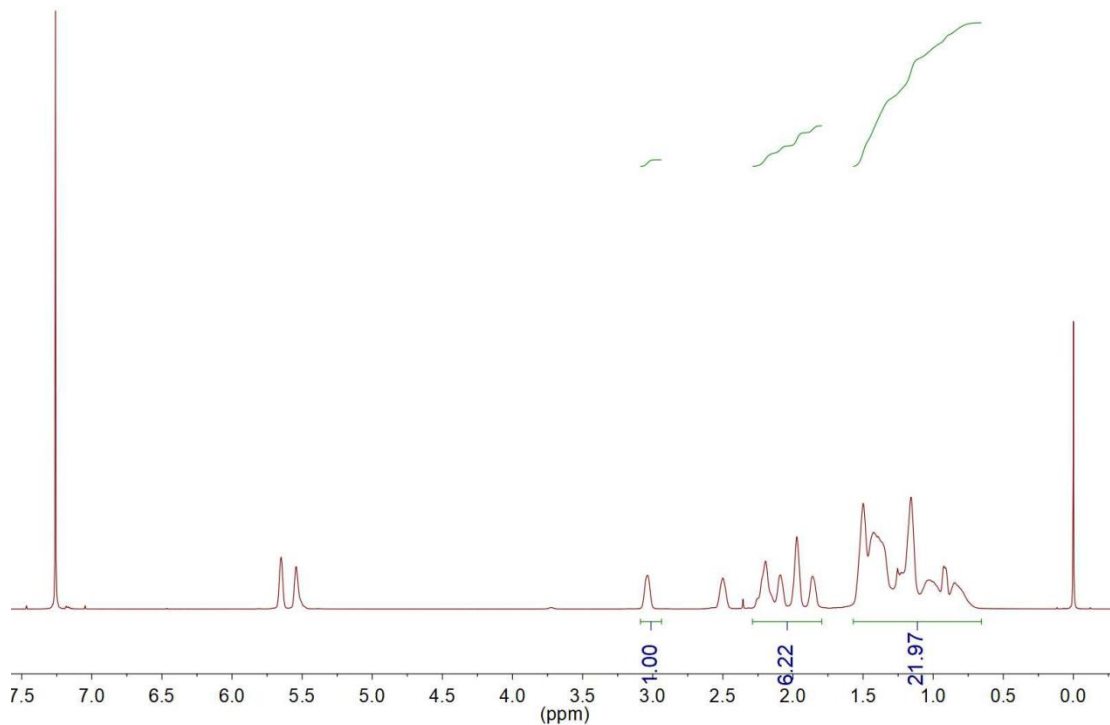

**Fig. S8**  $^1\text{H}$  NMR spectrum of ethylene/norbornene/dicyclopentadiene terpolymer (Table 1, entry 8,  $\text{CDCl}_3$ , 25  $^\circ\text{C}$ , 500 MHz).

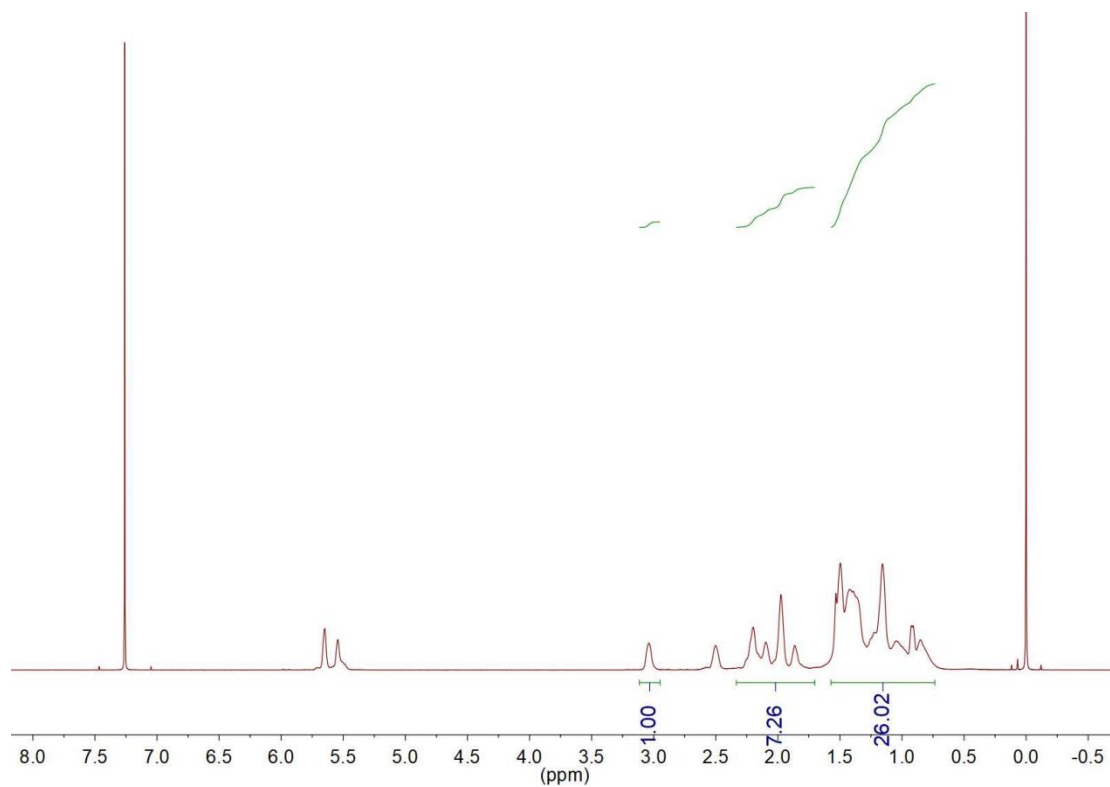

**Fig. S9**  $^1\text{H}$  NMR spectrum of ethylene/norbornene/dicyclopentadiene terpolymer (Table 1, entry 9,  $\text{CDCl}_3$ , 25  $^\circ\text{C}$ , 500 MHz).

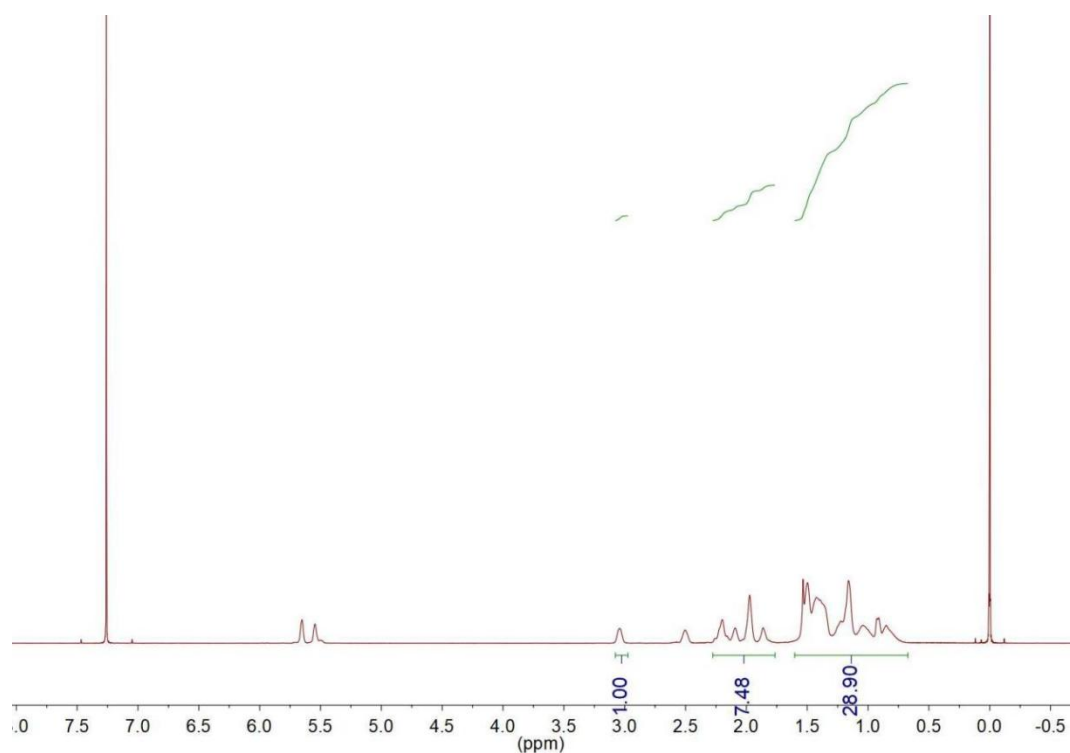

**Fig. S10**  $^1\text{H}$  NMR spectrum of ethylene/norbornene/dicyclopentadiene terpolymer (Table 1, entry 10,  $\text{CDCl}_3$ , 25  $^\circ\text{C}$ , 500 MHz).



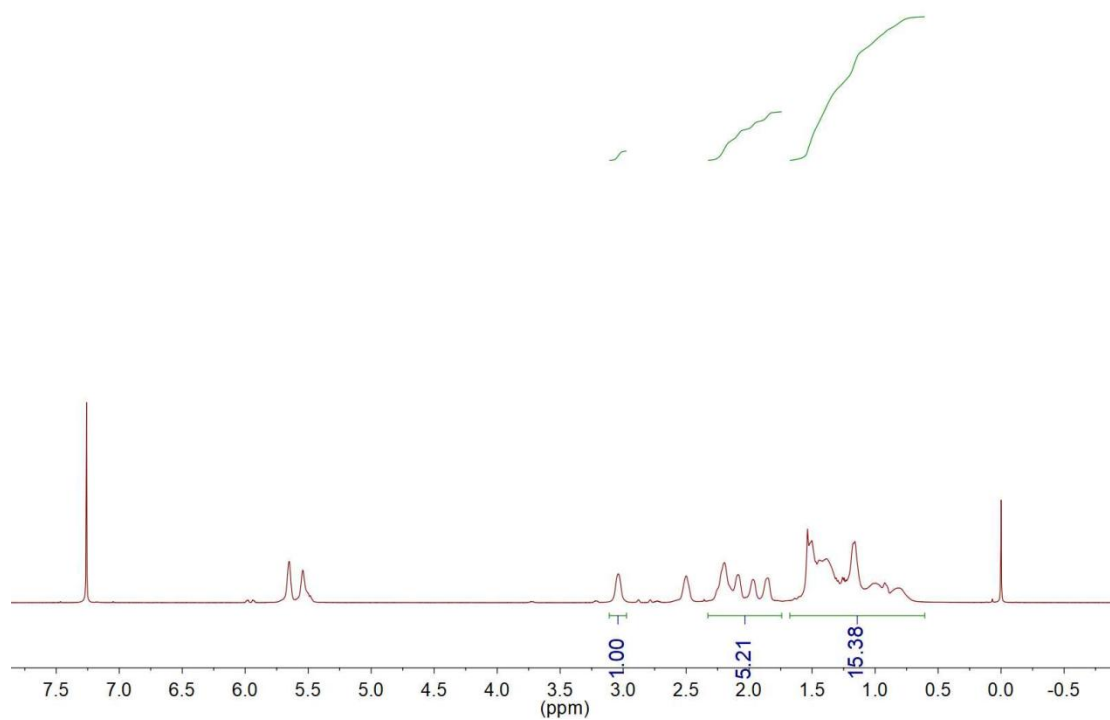

**Fig. S11** <sup>1</sup>H NMR spectrum of ethylene/norbornene/dicyclopentadiene terpolymer (Table 1, entry 11, CDCl<sub>3</sub>, 25 °C, 500 MHz).

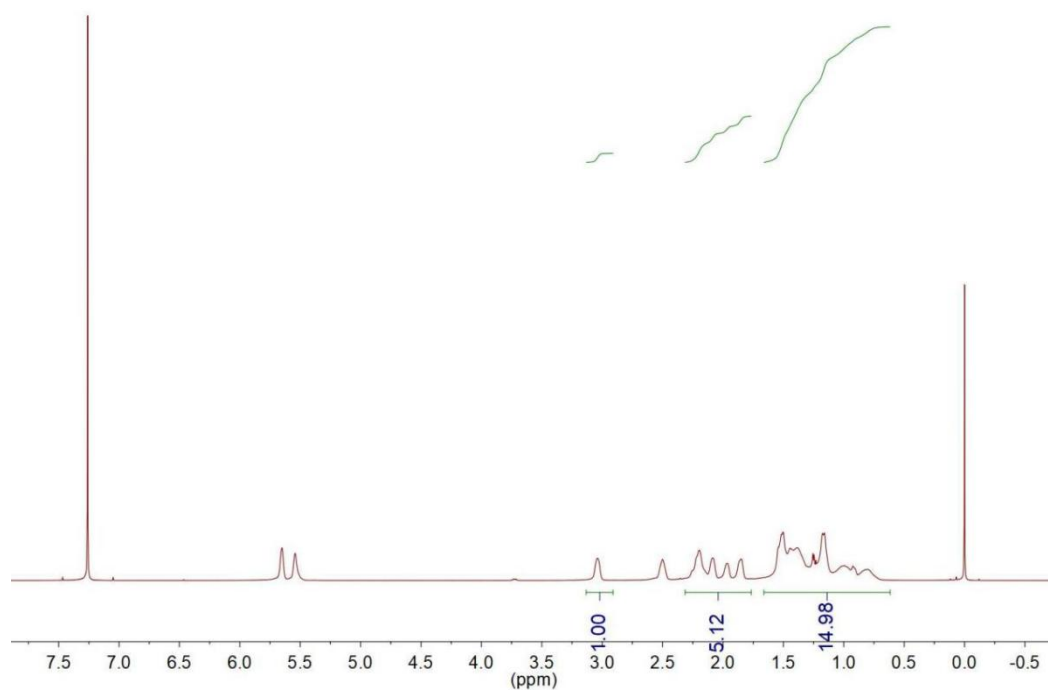

**Fig. S12** <sup>1</sup>H NMR spectrum of ethylene/norbornene/dicyclopentadiene terpolymer (Table 1, entry 12, CDCl<sub>3</sub>, 25 °C, 500 MHz).

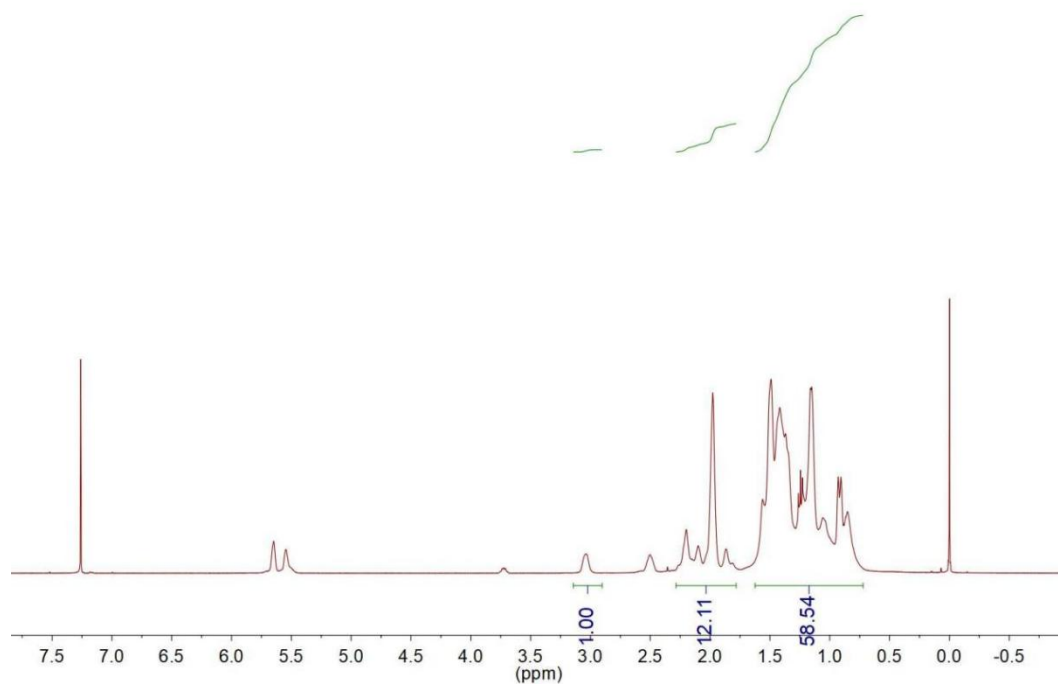

**Fig. S13**  $^1\text{H}$  NMR spectrum of ethylene/norbornene/dicyclopentadiene terpolymer (Table 1, entry 13,  $\text{CDCl}_3$ , 25  $^\circ\text{C}$ , 500 MHz).

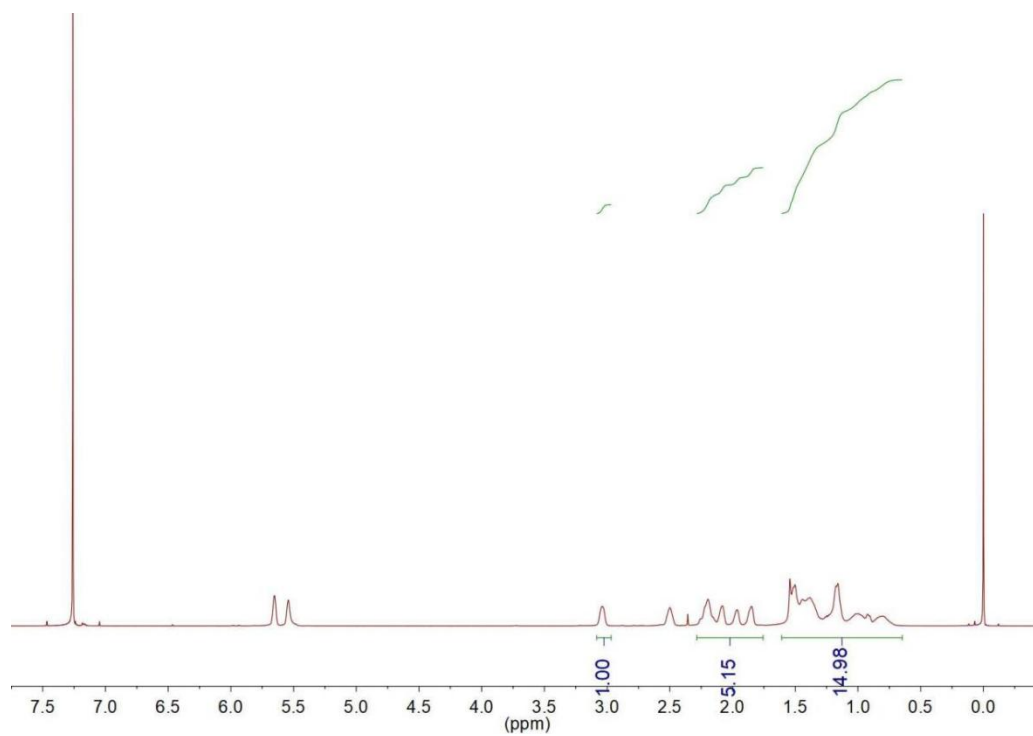

**Fig. S14**  $^1\text{H}$  NMR spectrum of ethylene/norbornene/dicyclopentadiene terpolymer (Table 1, entry 14,  $\text{CDCl}_3$ , 25  $^\circ\text{C}$ , 500 MHz).

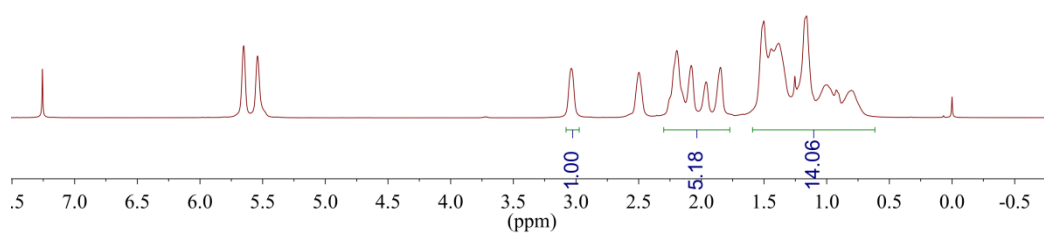

**Fig. S15**  $^1\text{H}$  NMR spectrum of ethylene/norbornene/dicyclopentadiene terpolymer (Table 1, entry 15,  $\text{CDCl}_3$ , 25  $^\circ\text{C}$ , 500 MHz).

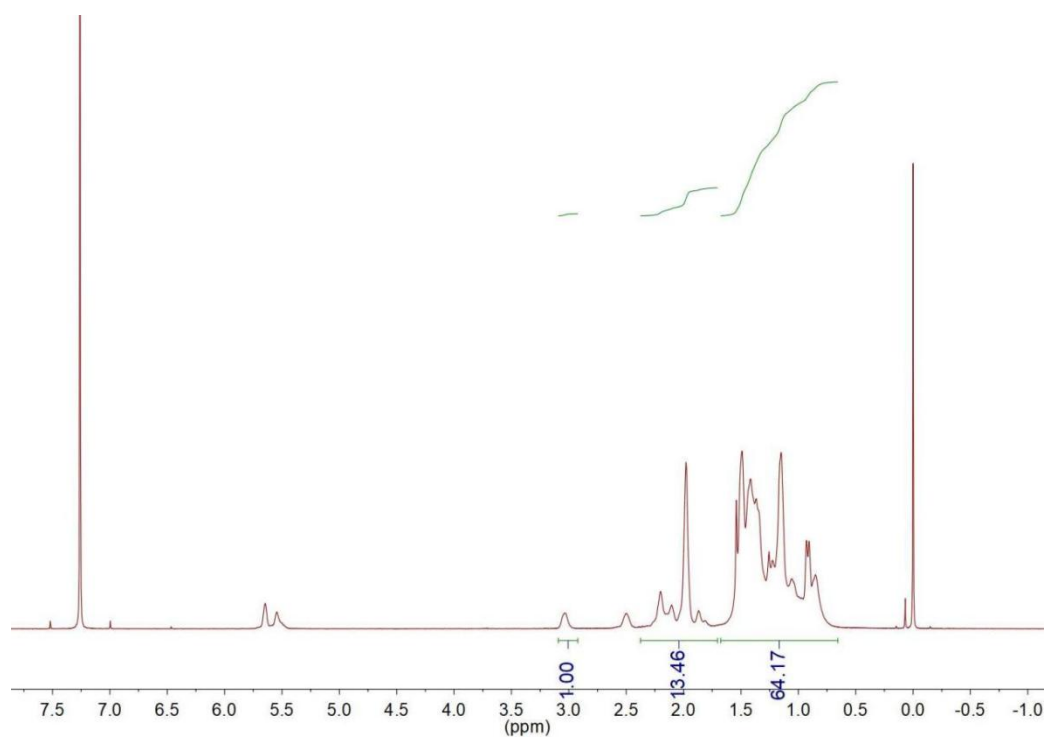

**Fig. S16**  $^1\text{H}$  NMR spectrum of ethylene/norbornene/dicyclopentadiene terpolymer (Table 1, entry 16,  $\text{CDCl}_3$ , 25  $^\circ\text{C}$ , 500 MHz).

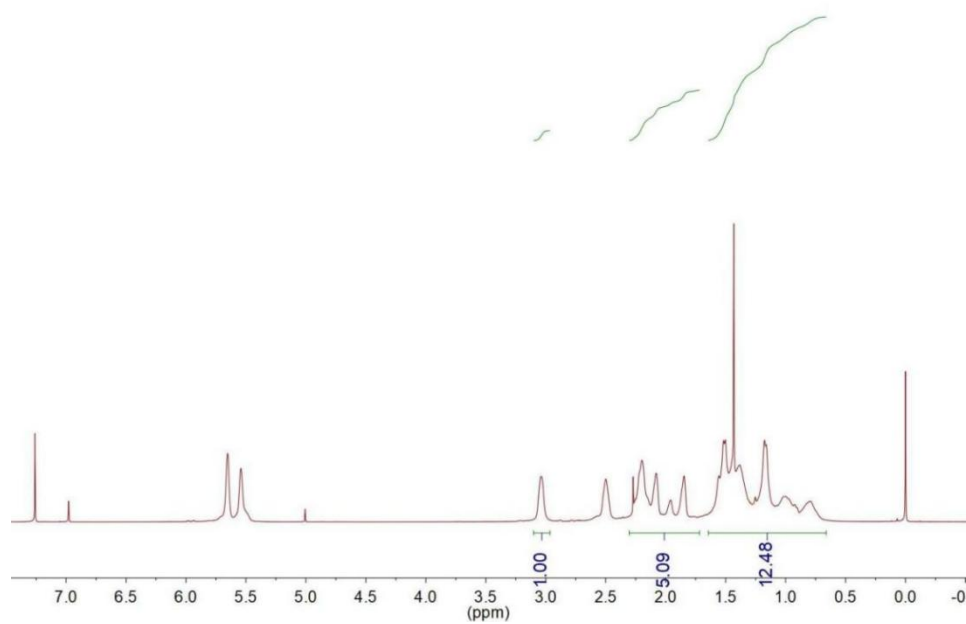

**Fig. S17**  $^1\text{H}$  NMR spectrum of ethylene/norbornene/dicyclopentadiene terpolymer (Table 1, entry 17,  $\text{CDCl}_3$ , 25  $^\circ\text{C}$ , 500 MHz).

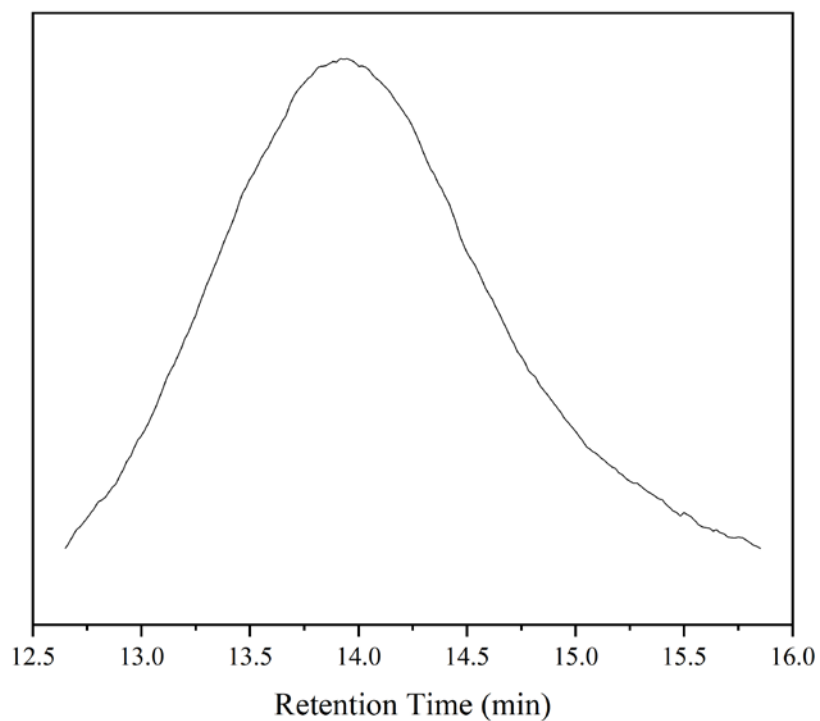

**Fig. S18** GPC curve of ethylene/norbornene copolymer (Table 1, entry 1).

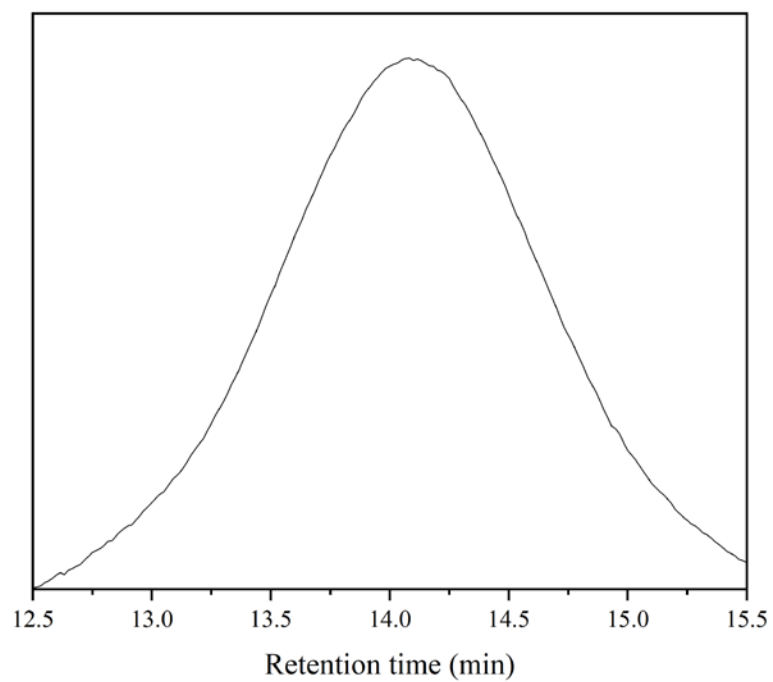

**Fig. S19** GPC curve of ethylene/norbornene copolymer (Table 1, entry 2).

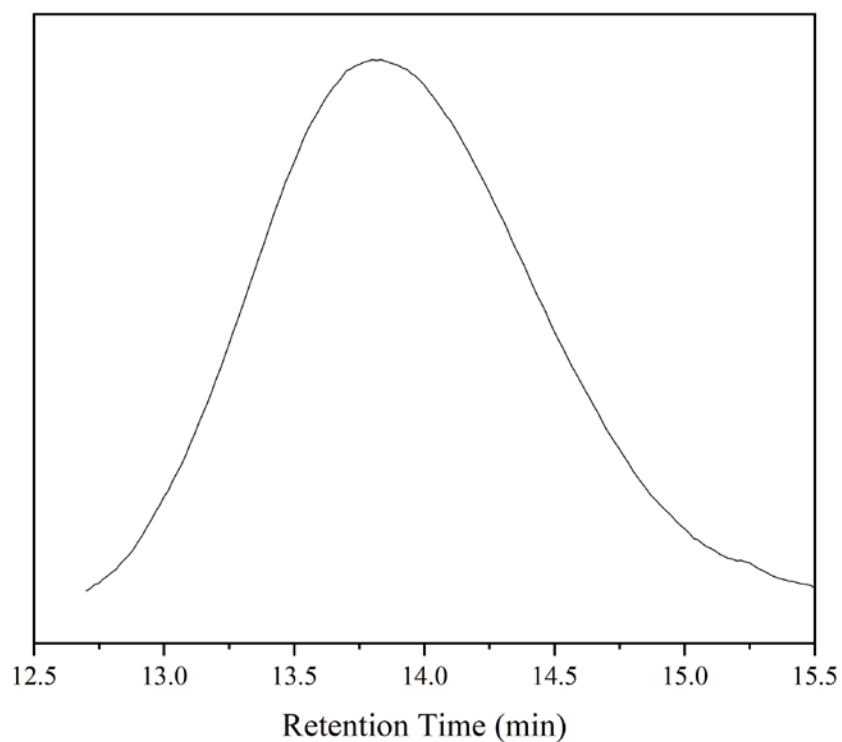

**Fig. S20** GPC curve of ethylene/norbornene copolymer (Table 1, entry 3).

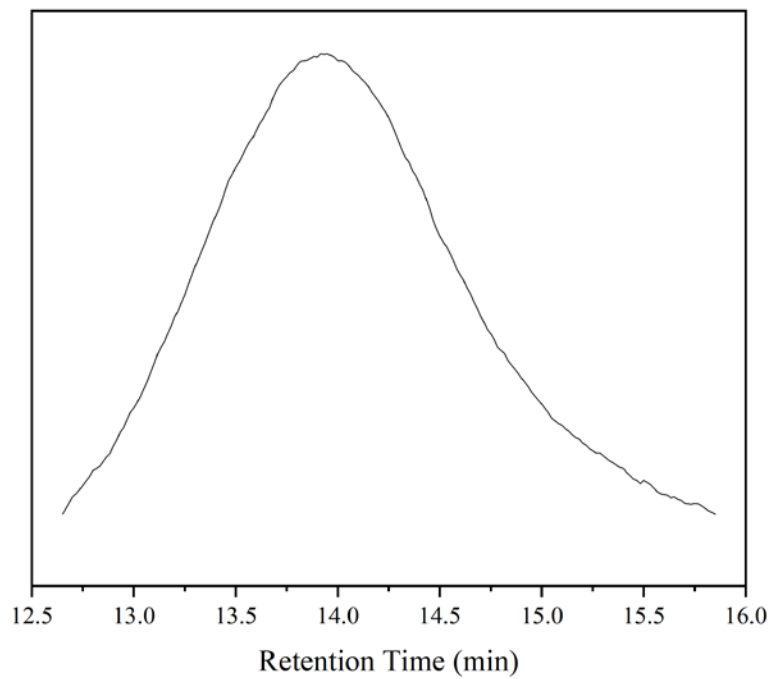

**Fig. S21** GPC curve of ethylene/norbornene copolymer (Table 1, entry 4).

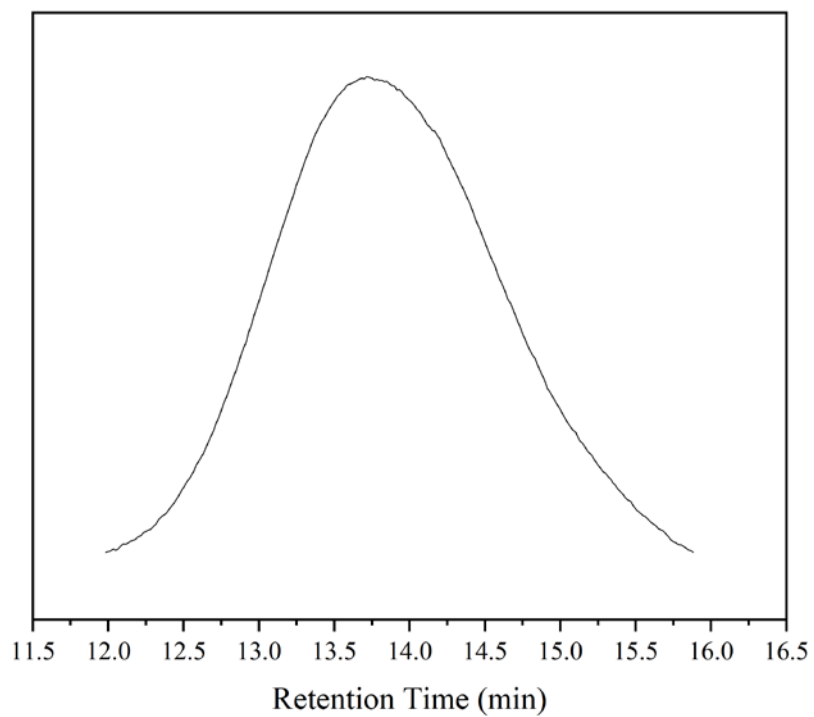

**Fig. S22** GPC curve of ethylene/norbornene copolymer (Table 1, entry 5).

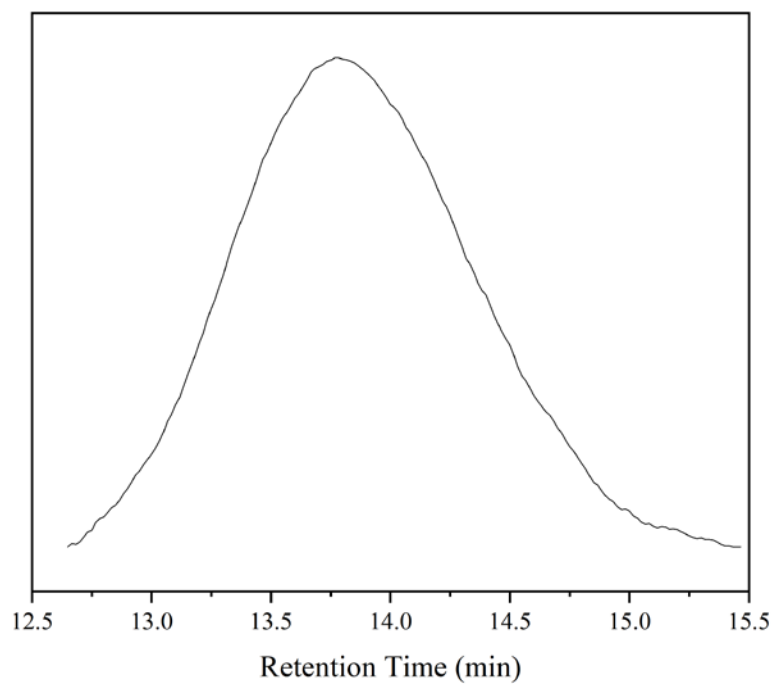

**Fig. S23** GPC curve of ethylene/norbornene copolymer (Table 1, entry 6).

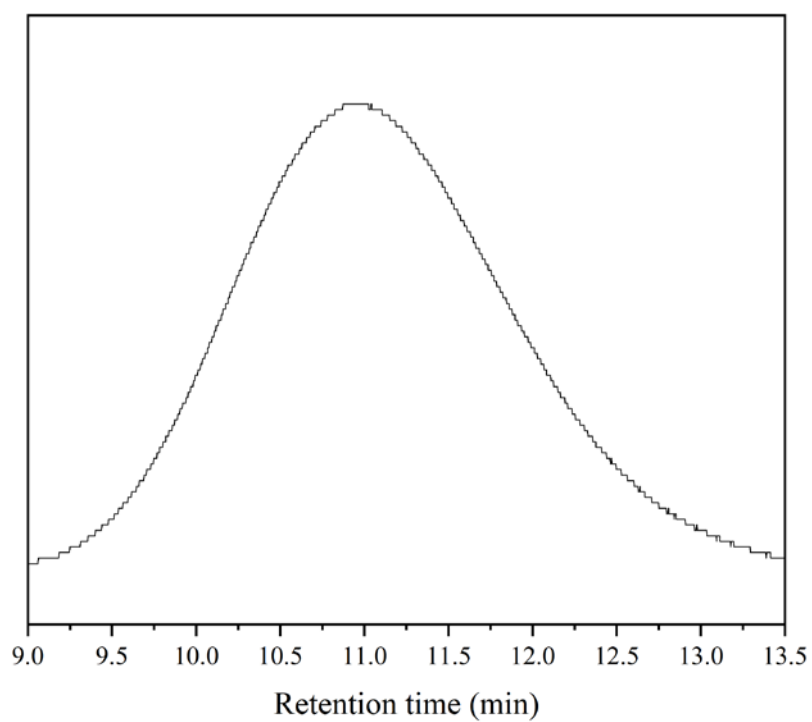

**Fig. S24** GPC curve of ethylene/norbornene/dicyclopentadiene terpolymer (Table 1, entry 7).

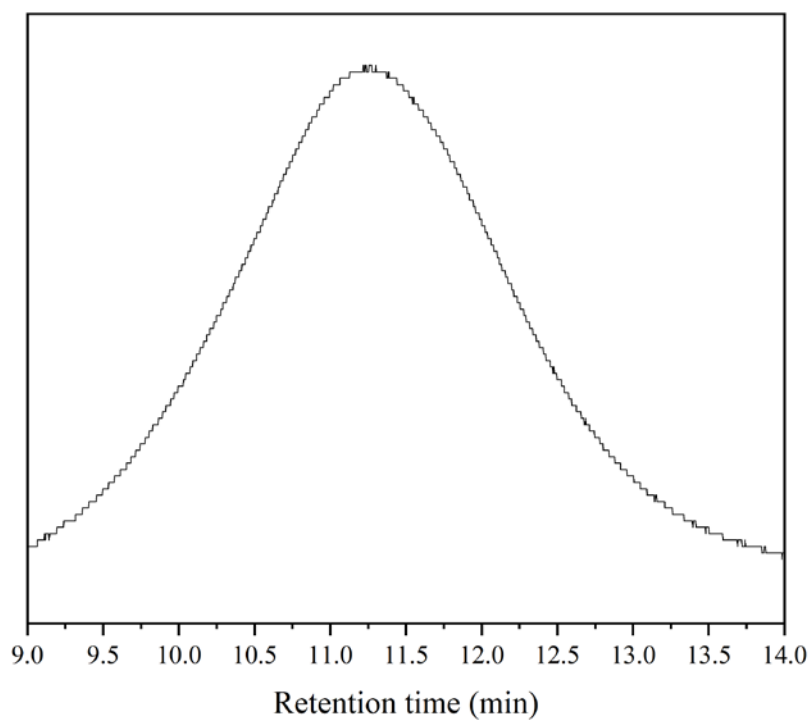

**Fig. S25** GPC curve of ethylene/norbornene/dicyclopentadiene terpolymer (Table 1, entry 8).

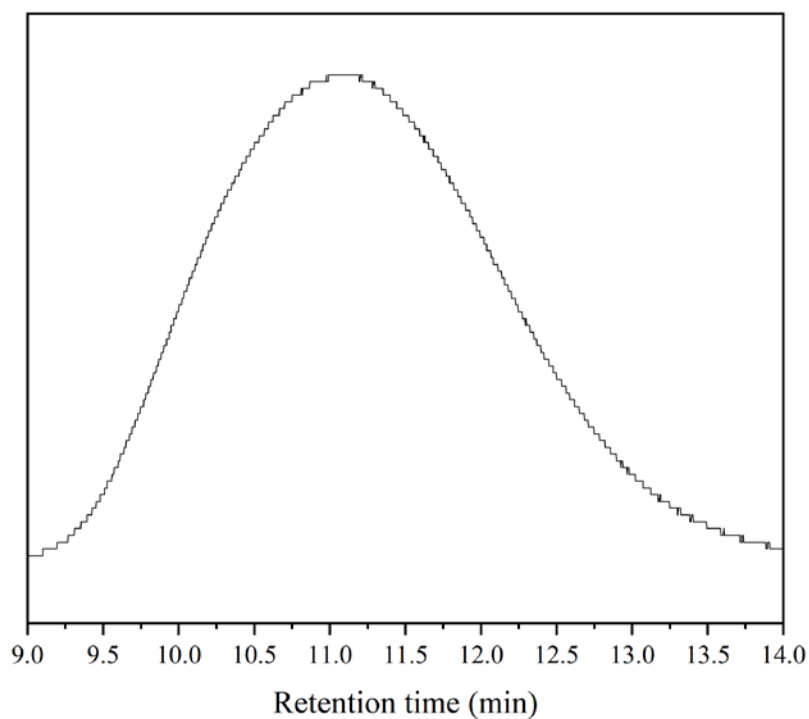

**Fig. S26** GPC curve of ethylene/norbornene/dicyclopentadiene terpolymer (Table 1, entry 9).



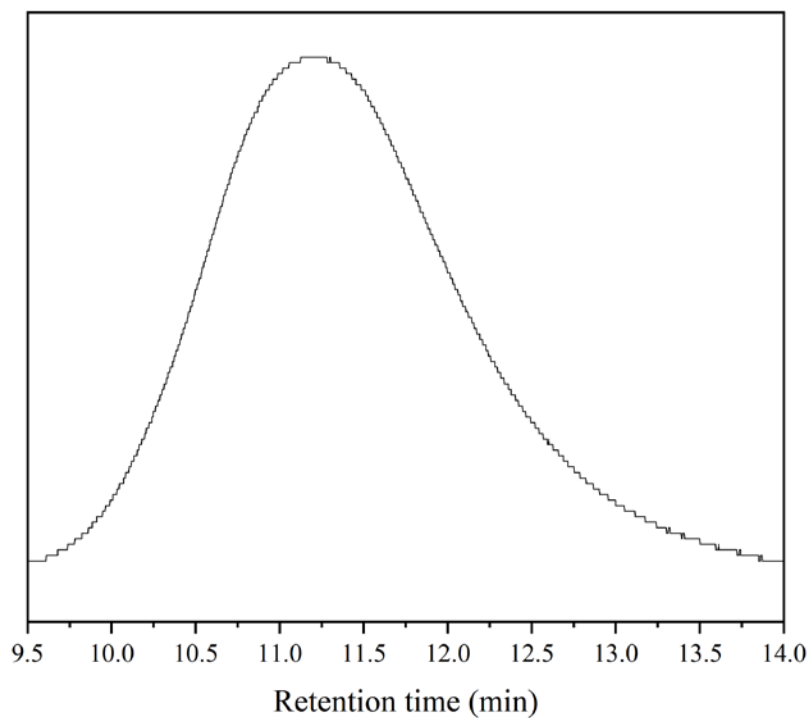

**Fig. S27** GPC curve of ethylene/norbornene/dicyclopentadiene terpolymer (Table 1, entry 10).

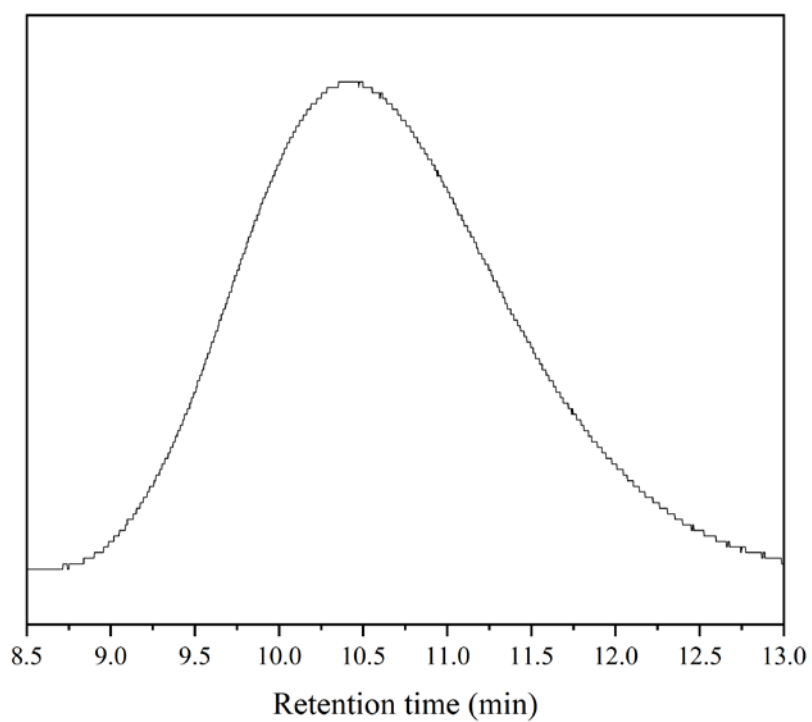

**Fig. S28** GPC curve of ethylene/norbornene/dicyclopentadiene terpolymer (Table 1, entry 11).

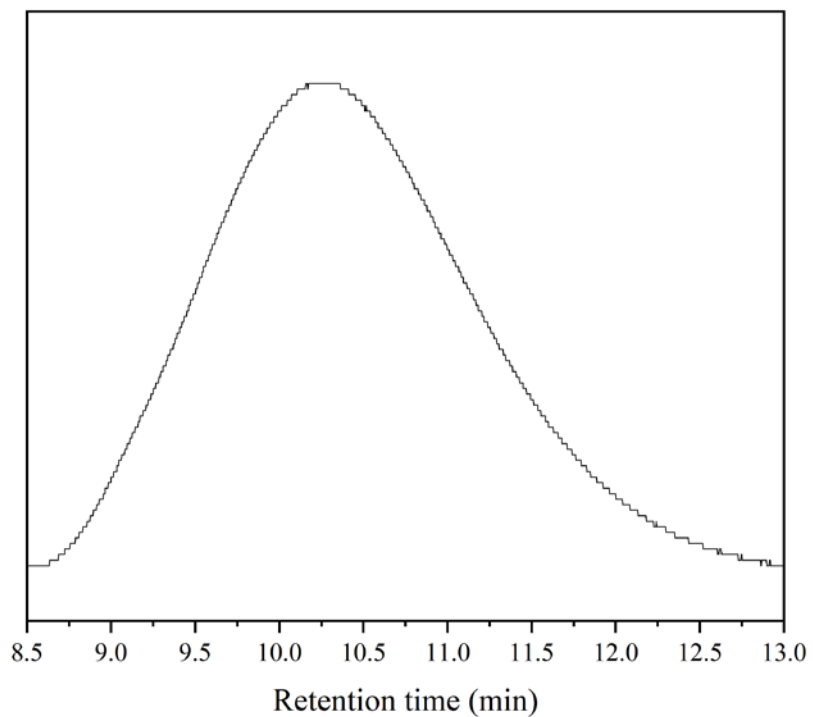

**Fig. S29** GPC curve of ethylene/norbornene/dicyclopentadiene terpolymer (Table 1, entry 12).

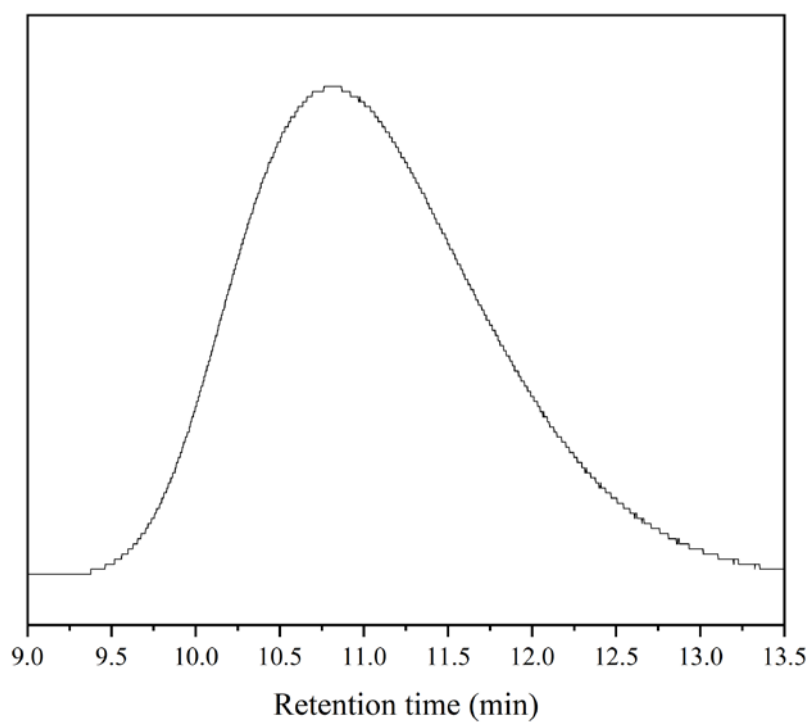

**Fig. S30** GPC curve of ethylene/norbornene/dicyclopentadiene terpolymer (Table 1, entry 13).

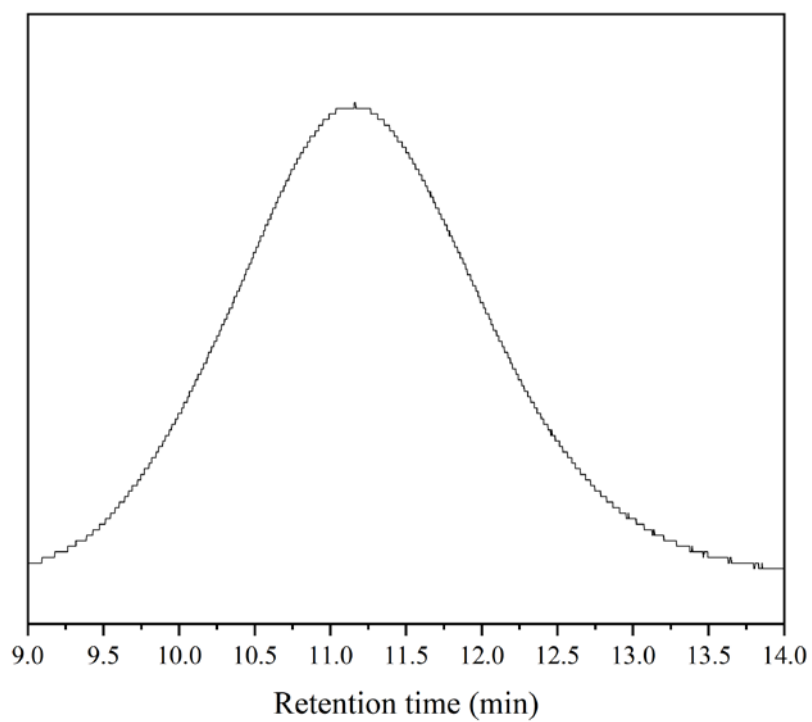

**Fig. S31** GPC curve of ethylene/norbornene/dicyclopentadiene terpolymer (Table 1, entry 14).

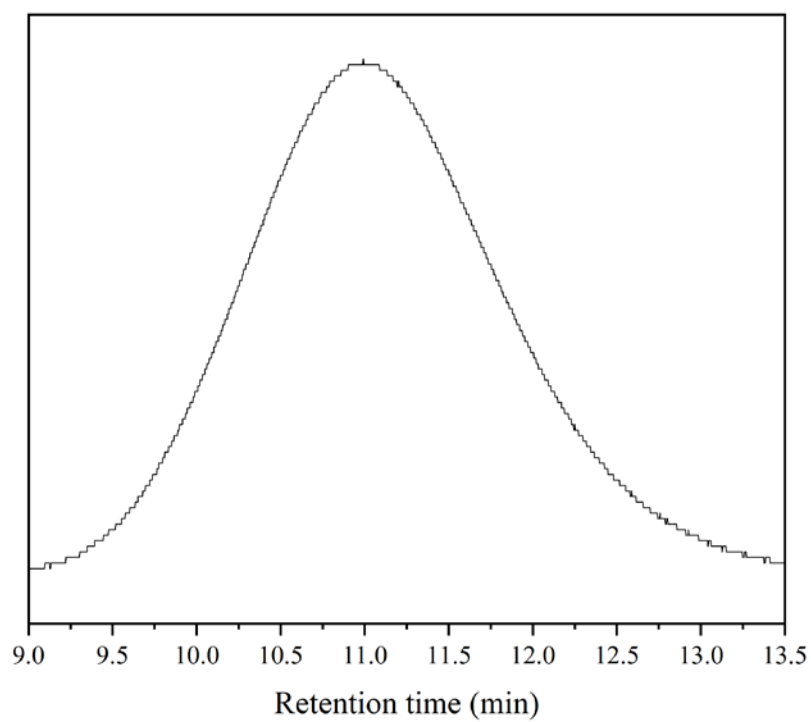

**Fig. S32** GPC curve of ethylene/norbornene/dicyclopentadiene terpolymer (Table 1, entry 15).

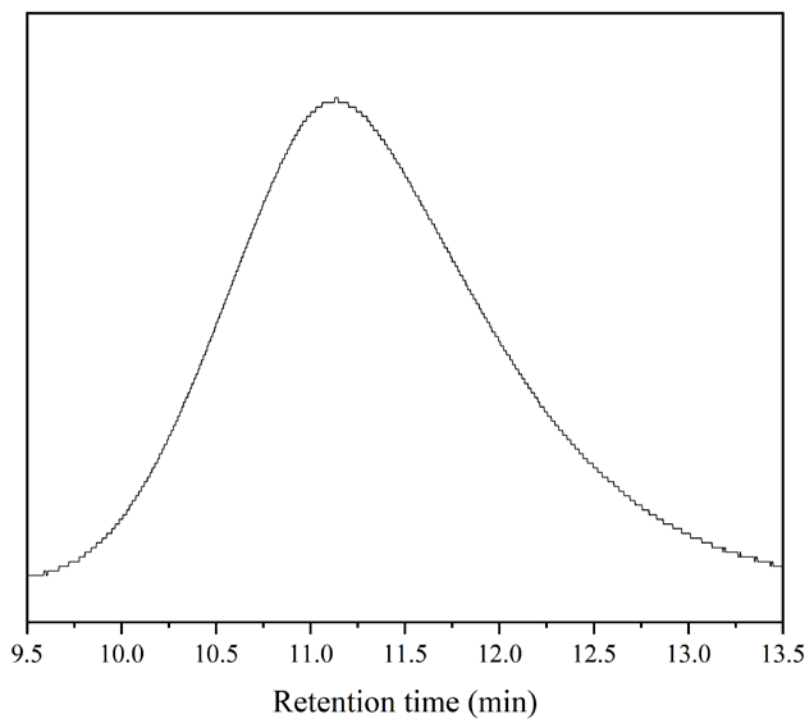

**Fig. S33** GPC curve of ethylene/norbornene/dicyclopentadiene terpolymer (Table 1, entry 16).

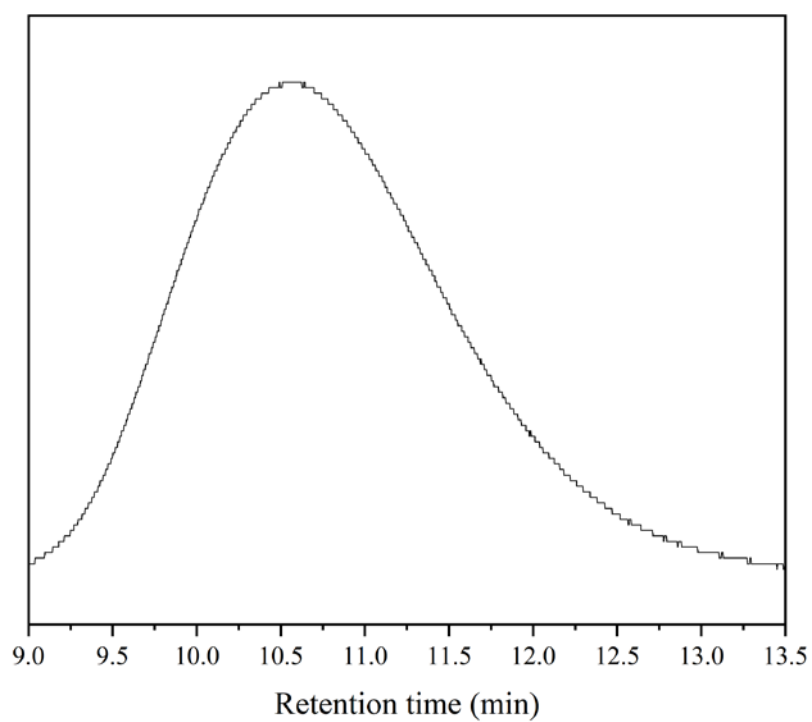

**Fig. S34** GPC curve of ethylene/norbornene/dicyclopentadiene terpolymer (Table 1, entry 17).

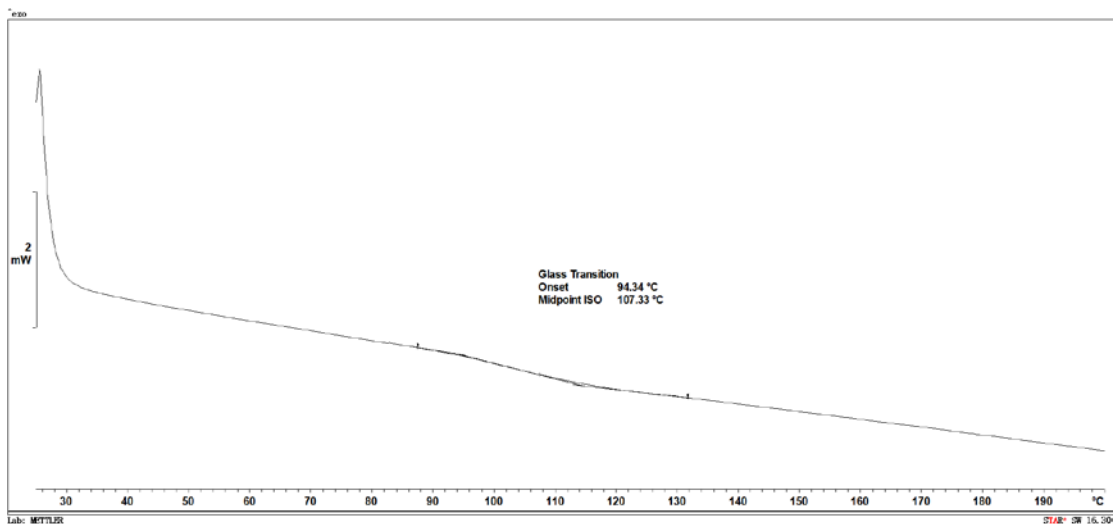

**Fig. S35** DSC curve of the ethylene/norbornene copolymer (Table 1, entry 1).

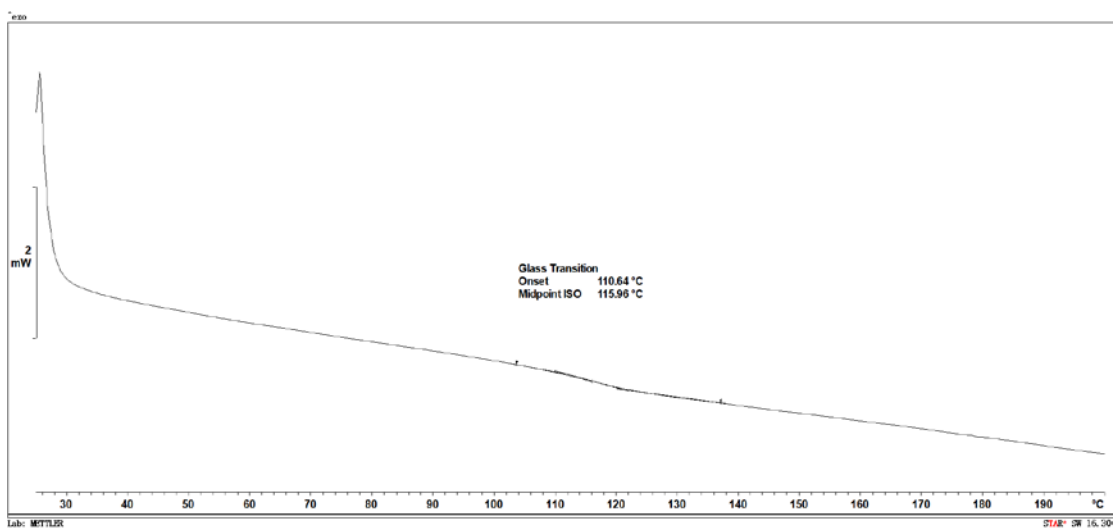

**Fig. S36** DSC curve of the ethylene/norbornene copolymer (Table 1, entry 2).

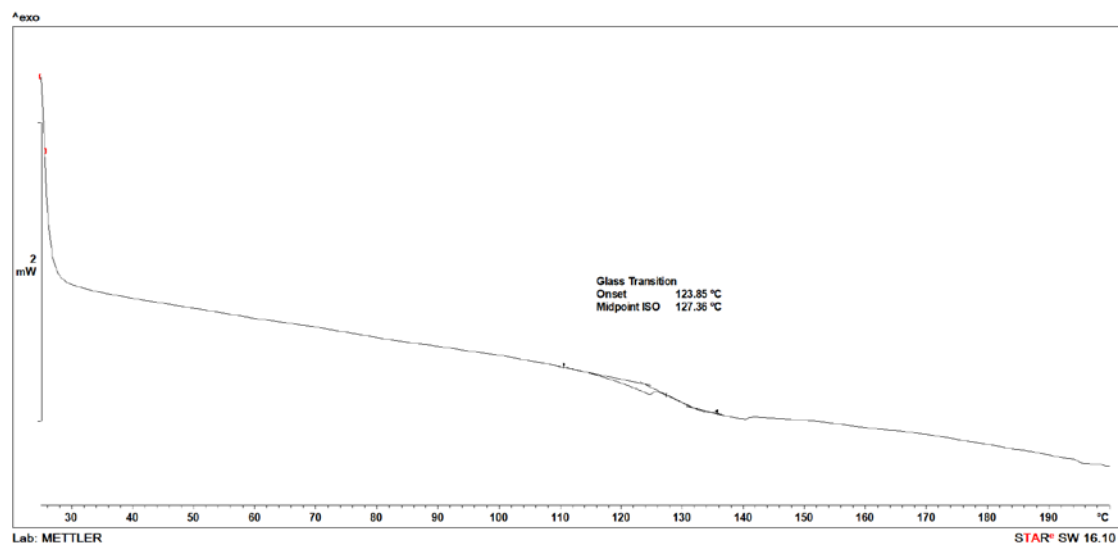

**Fig. S37** DSC curve of the ethylene/norbornene copolymer (Table 1, entry 3).

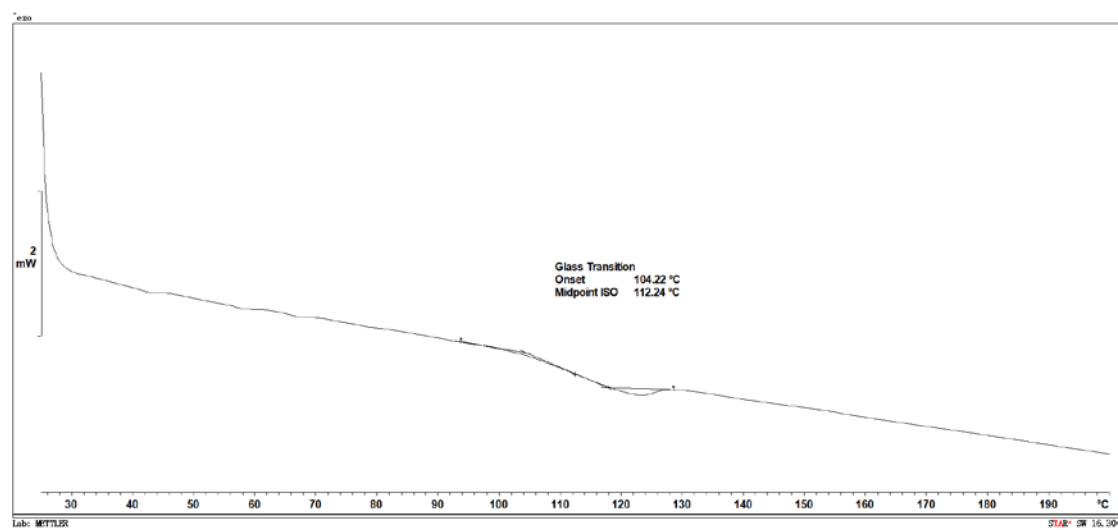

**Fig. S38** DSC curve of the ethylene/norbornene copolymer (Table 1, entry 4).

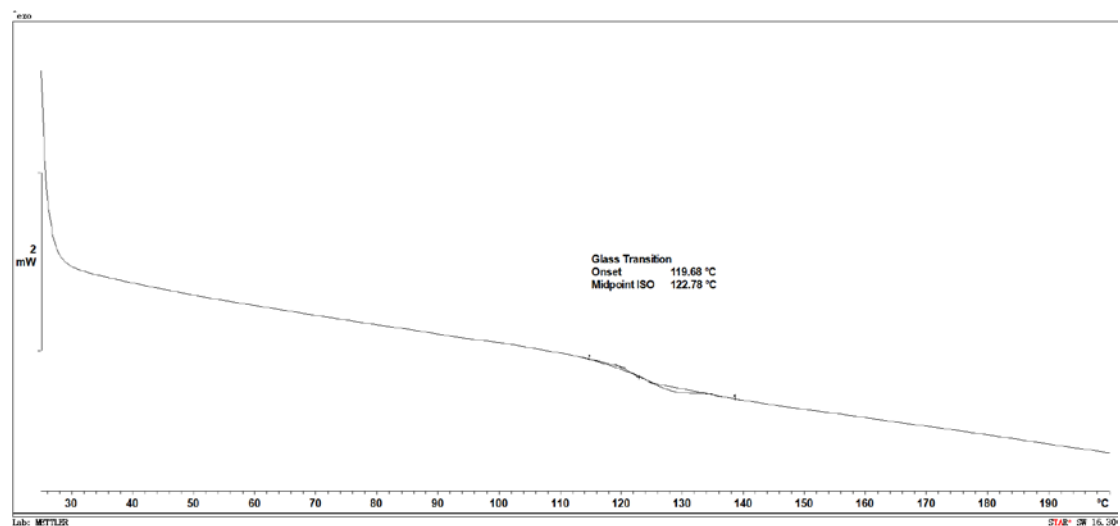

**Fig. S39** DSC curve of the ethylene/norbornene copolymer (Table 1, entry 5).

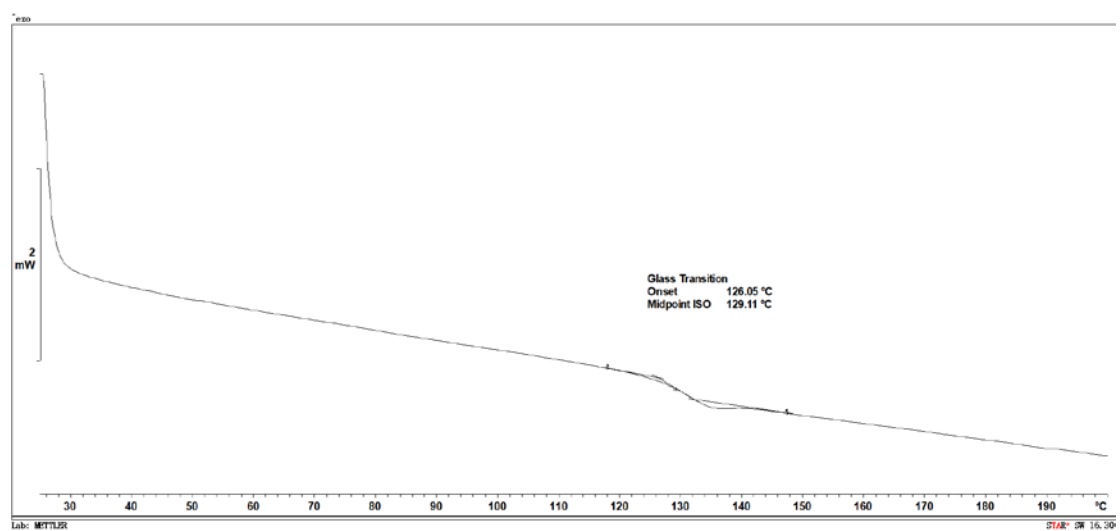

**Fig. S40** DSC curve of the ethylene/norbornene copolymer (Table 1, entry 6).

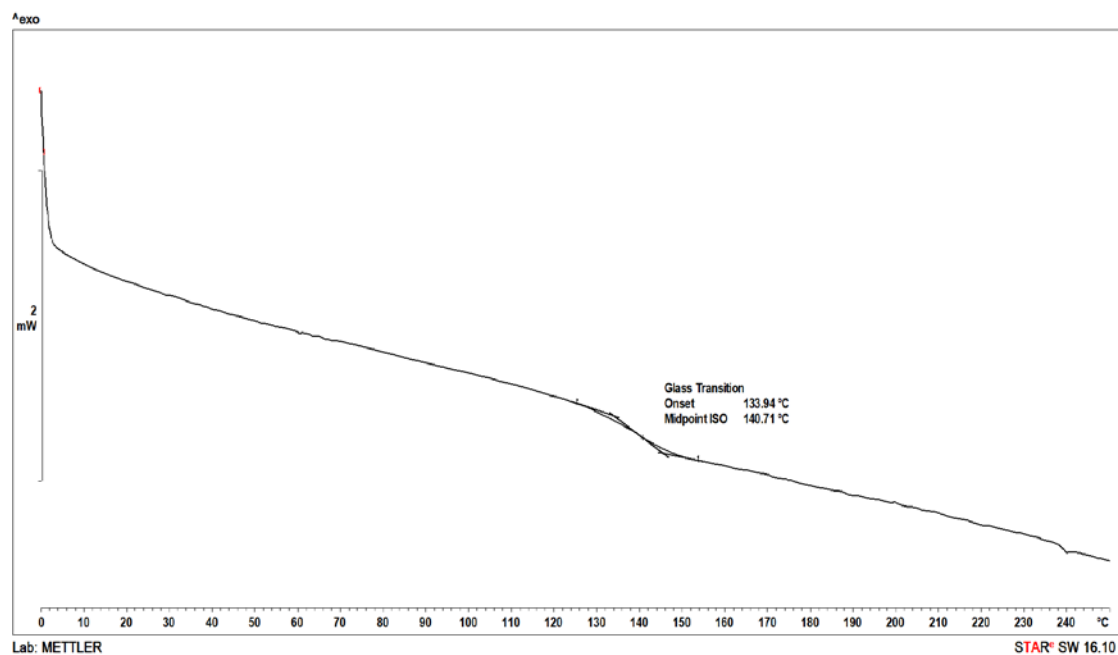

**Fig. S41** DSC curve of the ethylene/norbornene/dicyclopentadiene terpolymer (Table 1, entry 7).

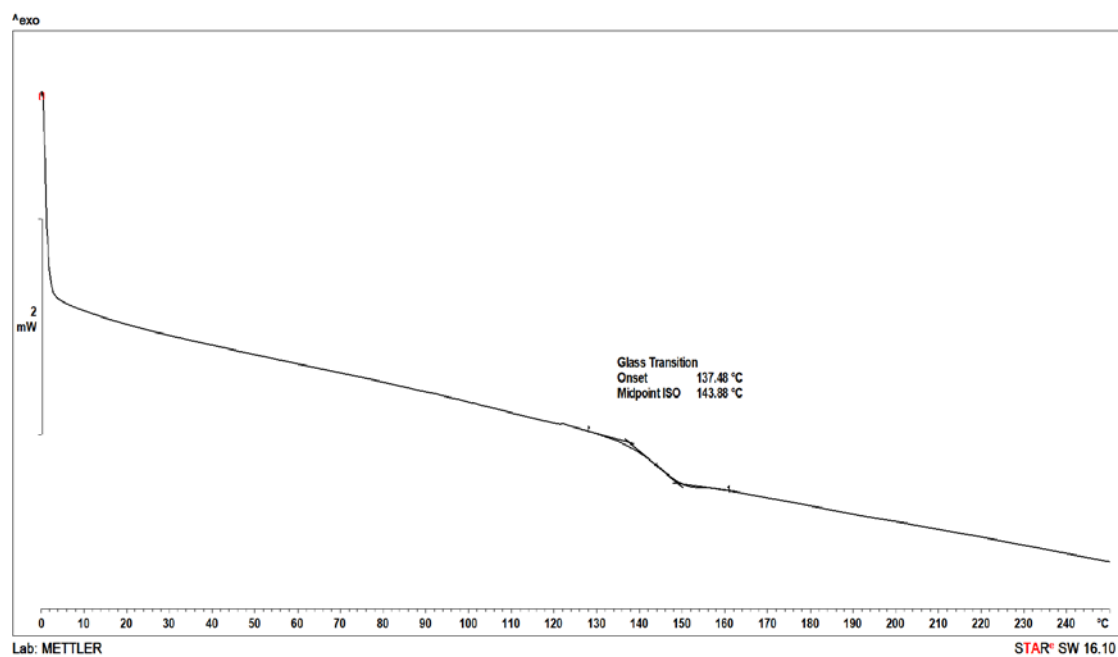

**Fig. S42** DSC curve of the ethylene/norbornene/dicyclopentadiene terpolymer (Table 1, entry 8).



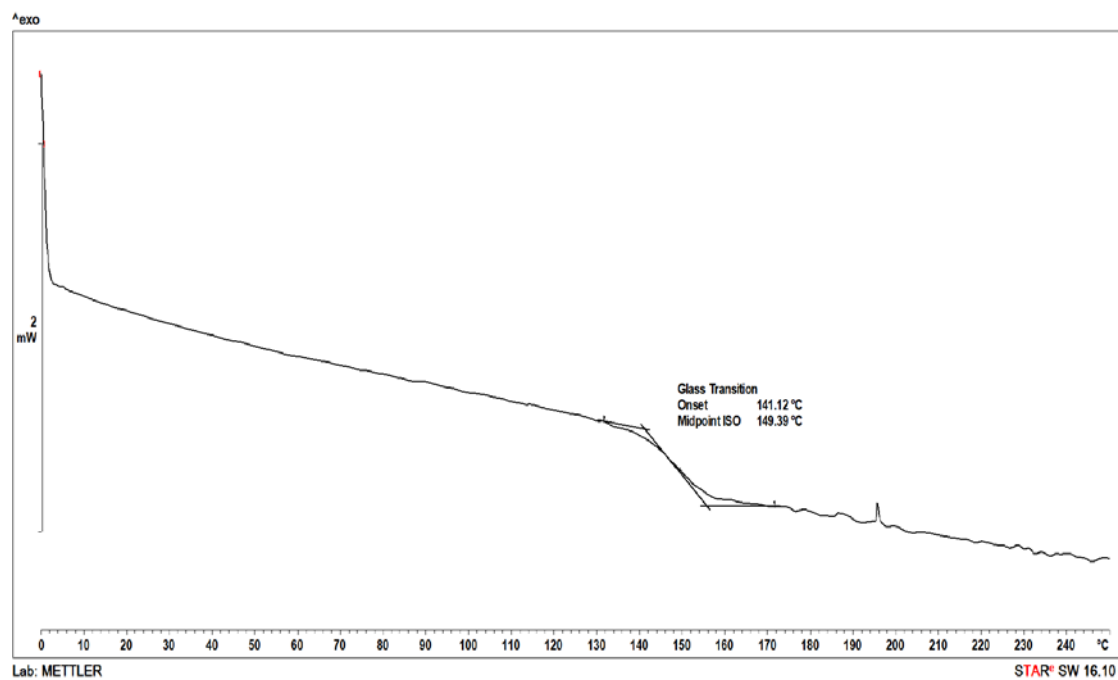

**Fig. S43** DSC curve of the ethylene/norbornene/dicyclopentadiene terpolymer (Table 1, entry 9).

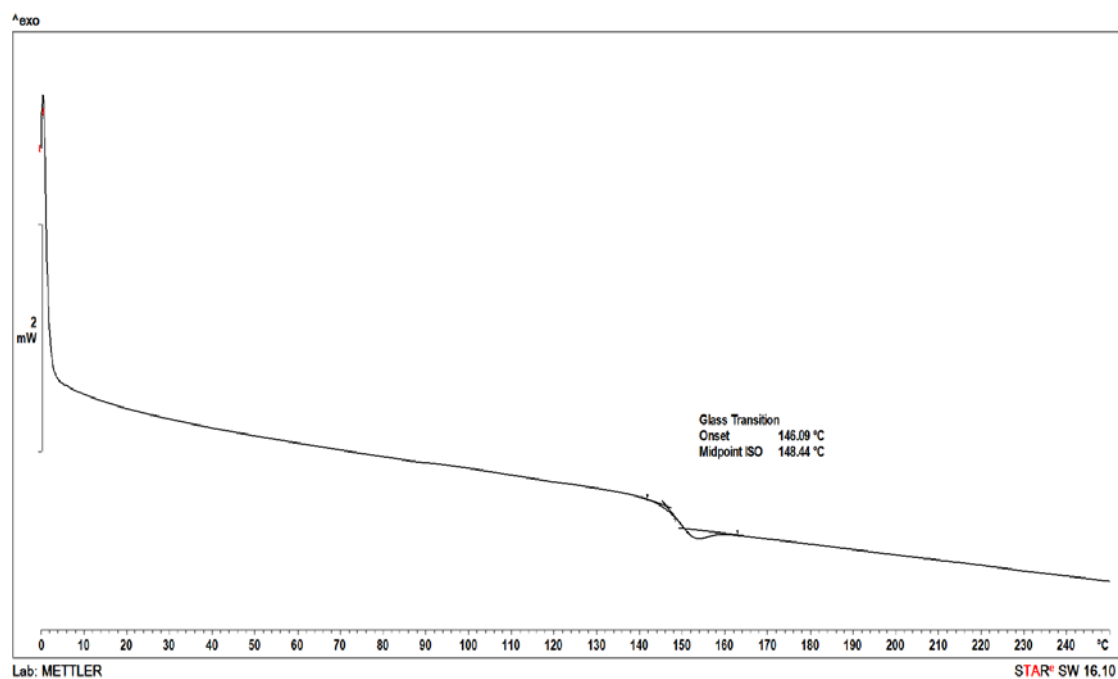

**Fig. S44** DSC curve of the ethylene/norbornene/dicyclopentadiene terpolymer (Table 1, entry 10).

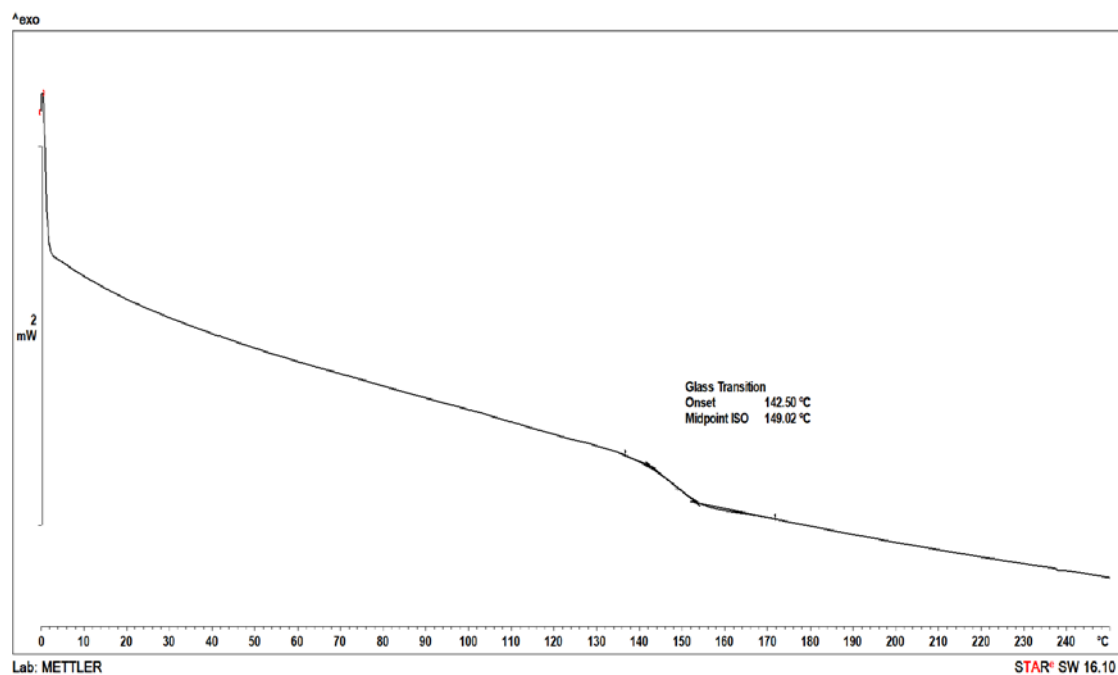

**Fig. S45** DSC curve of the ethylene/norbornene/dicyclopentadiene terpolymer (Table 1, entry 11).

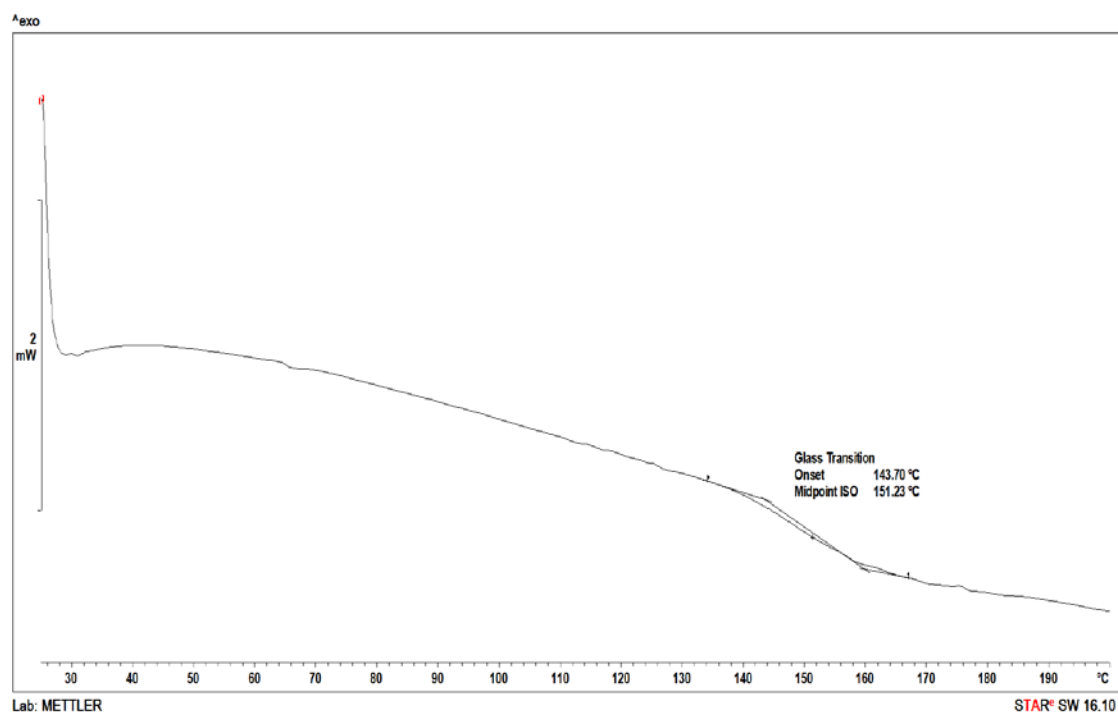

**Fig. S46** DSC curve of the ethylene/norbornene/dicyclopentadiene terpolymer (Table 1, entry 12).

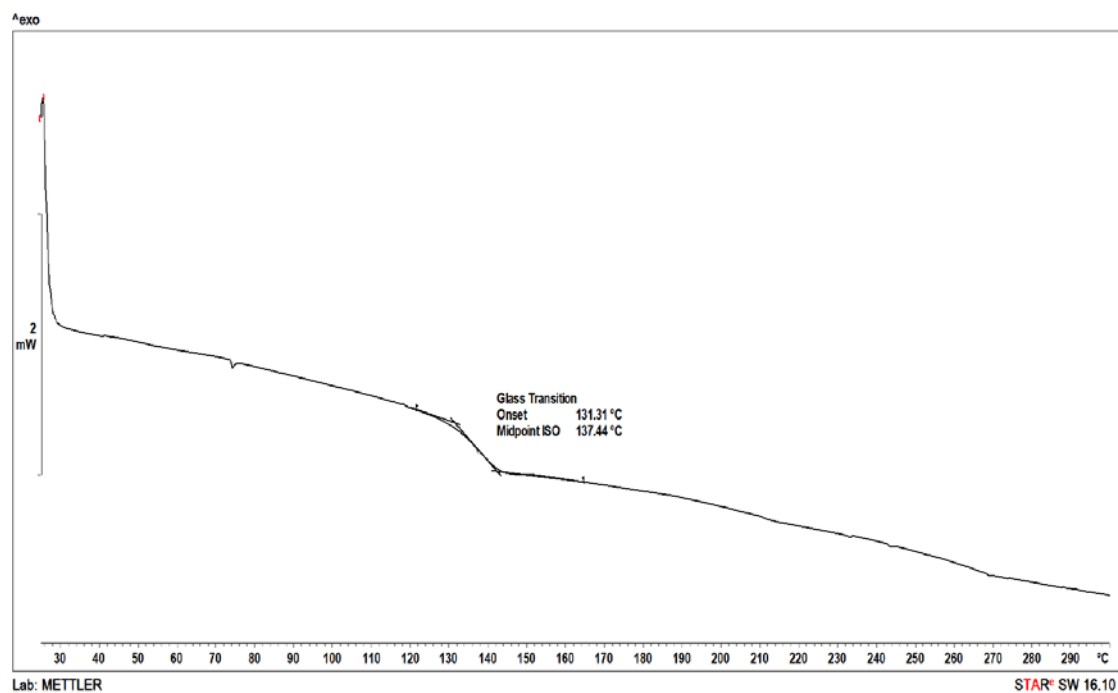

**Fig. S47** DSC curve of the ethylene/norbornene/dicyclopentadiene terpolymer (Table 1, entry 13).

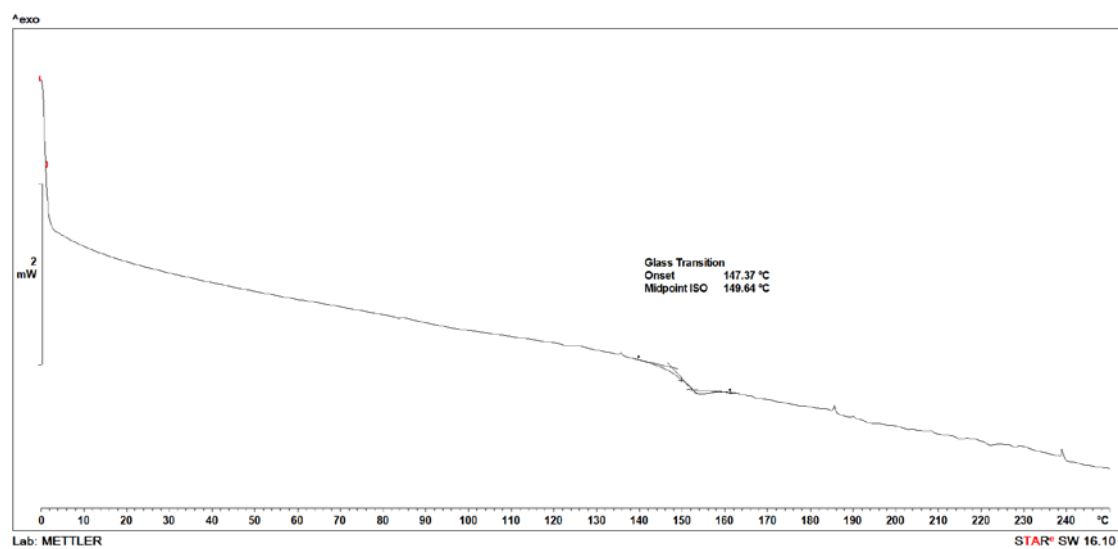

**Fig. S48** DSC curve of the ethylene/norbornene/dicyclopentadiene terpolymer (Table 1, entry 14).

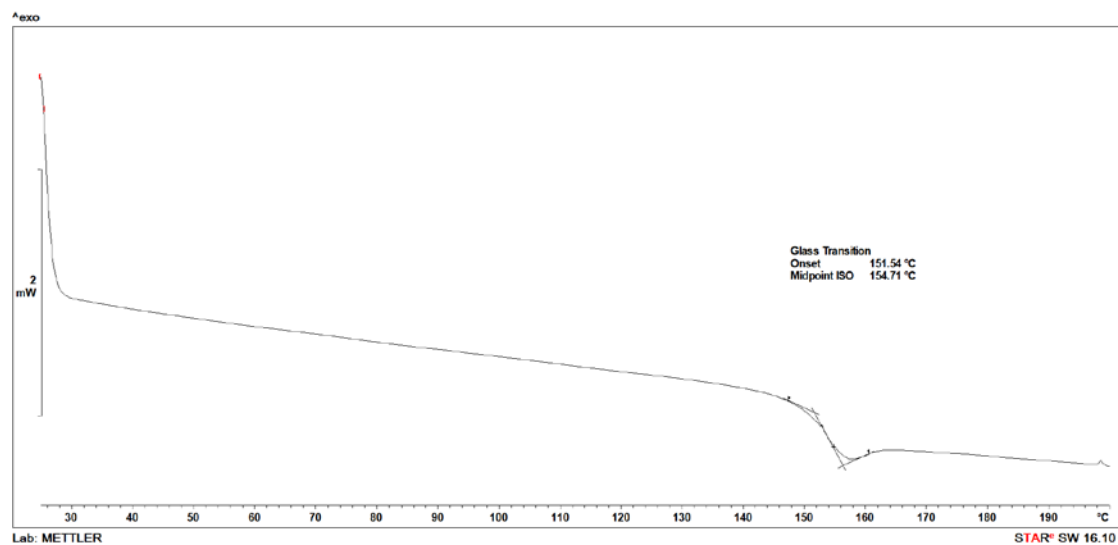

**Fig. S49** DSC curve of the ethylene/norbornene/dicyclopentadiene terpolymer (Table 1, entry 15).

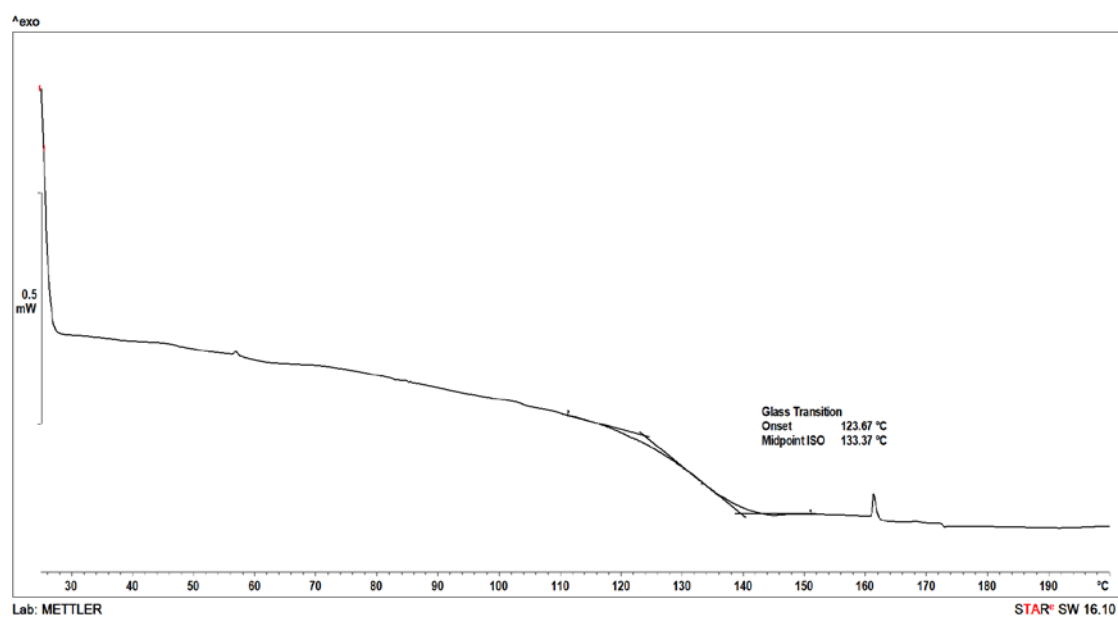

**Fig. S50** DSC curve of the ethylene/norbornene/dicyclopentadiene terpolymer (Table 1, entry 16).

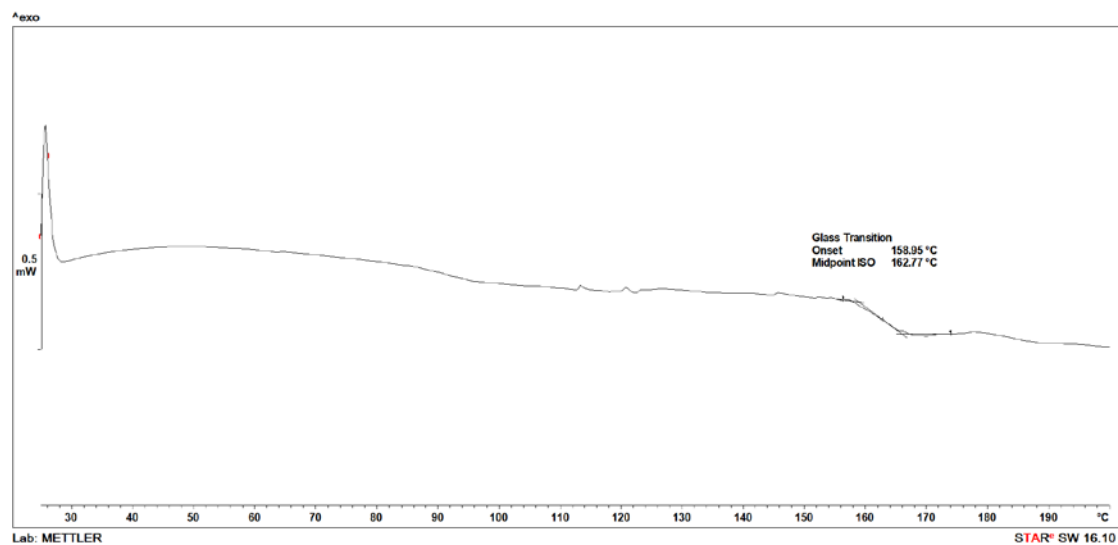

**Fig. S51** DSC curve of the ethylene/norbornene/dicyclopentadiene terpolymer (Table 1, entry 17).

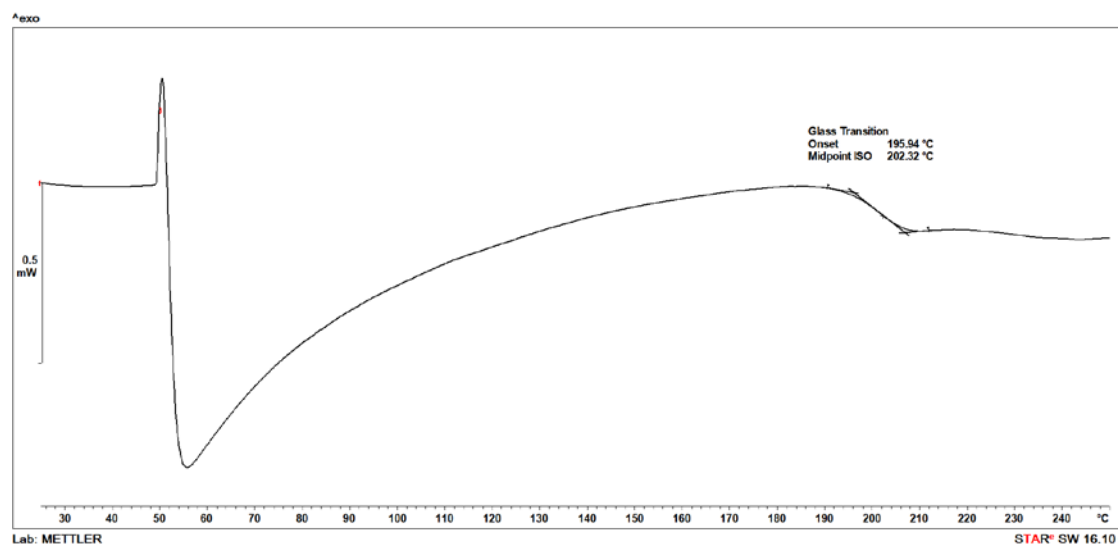

**Fig. S52** DSC curve of ethylene/norbornene/dicyclopentadiene hydroxylated terpolymer (Table 1, entry 17).

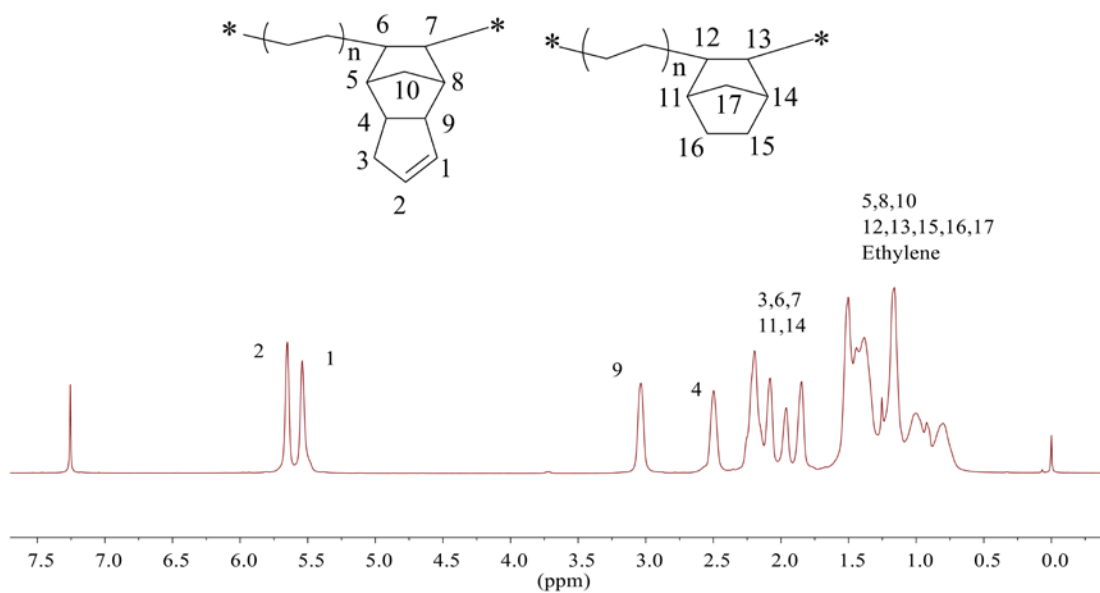

**Fig. S53**  $^1\text{H}$  NMR spectrum of ethylene/norbornene/dicyclopentadiene terpolymer (Table 1, entry 15,  $\text{CDCl}_3$ , 25  $^\circ\text{C}$ , 500 MHz).

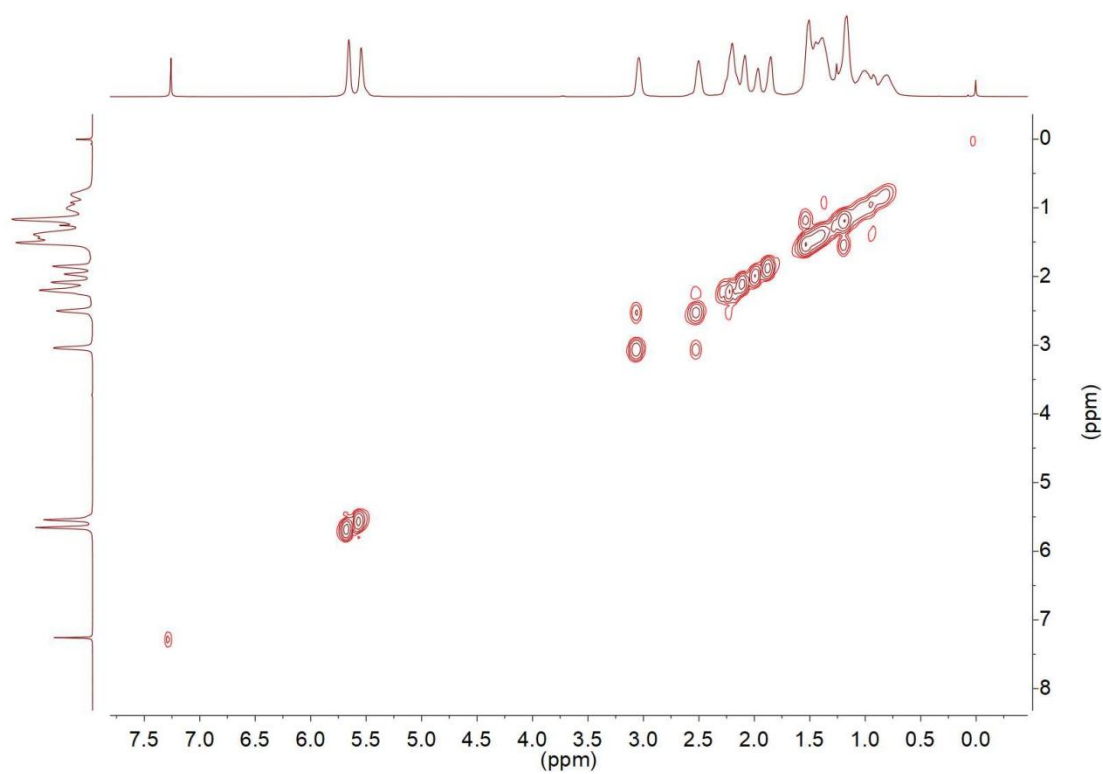

**Fig. S54**  $^1\text{H}$ - $^1\text{H}$  COSY spectrum of ethylene/norbornene/dicyclopentadiene terpolymer (Table 1, entry 15,  $\text{CDCl}_3$ , 25  $^\circ\text{C}$ , 500 MHz).

|                         | $^1\text{H}$ NMR | $^{13}\text{C}$ NMR |
|-------------------------|------------------|---------------------|
| CH(1)                   | 5.54             | 132.86              |
| CH(2)                   | 5.65             | 130.83              |
| CH <sub>2</sub> (3)     | 2.22             | 32.51               |
| CH(4)                   | 2.53             | 42.51               |
| CH <sub>2</sub> (5)     | 1.36,1.46        | 38.27,37.28         |
| CH(6)                   | 1.87             | 45.76,46.52         |
| CH(7)                   | 2.08             | 44.10,45.17         |
| CH <sub>2</sub> (8)     | 1.46,1.52        | 41.53,40.56         |
| CH(9)                   | 3.06             | 53.31               |
| CH <sub>2</sub> (10)    | 1.52,1.18        | 36.12               |
| CH <sub>2</sub> (11,14) | 1.98             | 40.82               |
| CH <sub>2</sub> (12,13) | 1.37             | 47.31               |
| CH <sub>2</sub> (15,16) | /                | 30.12               |
| CH <sub>2</sub> (17)    | 0.93,1.35        | 32.82               |

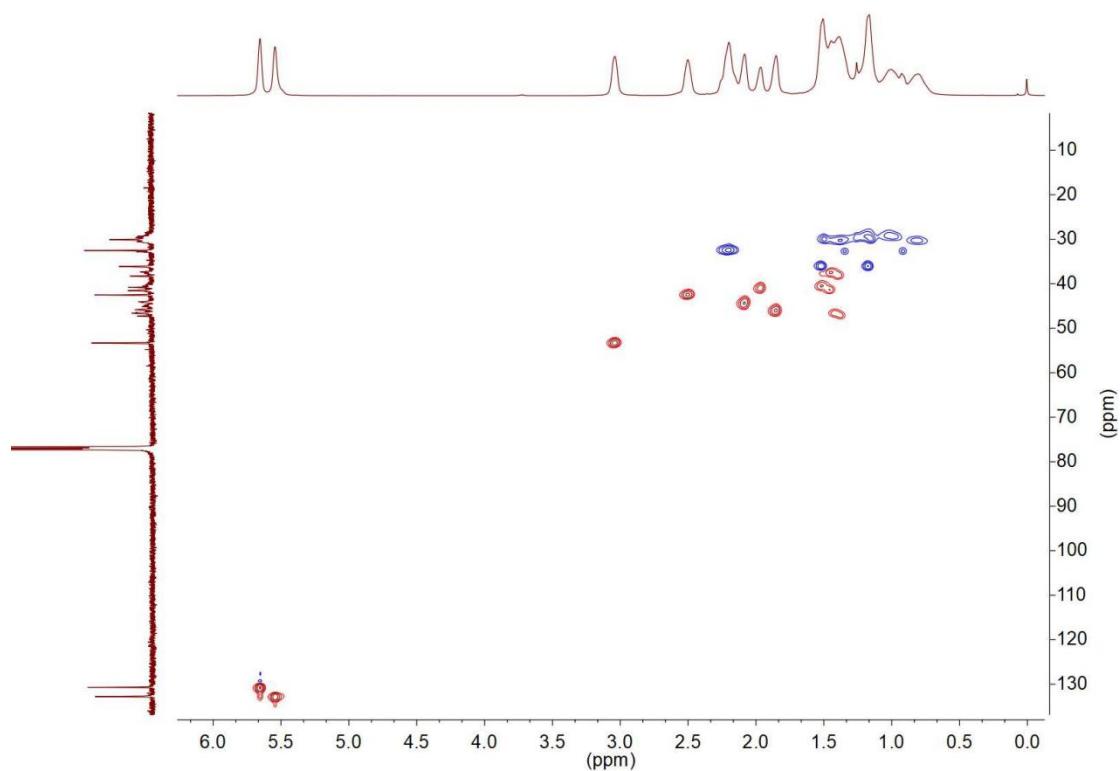

**Fig. S55**  $^1\text{H}$ - $^{13}\text{C}$  HSQC NMR spectrum of ethylene/norbornene/dicyclopentadiene terpolymer (Table 1, entry 15,  $\text{CDCl}_3$ , 25 °C, 500 MHz).

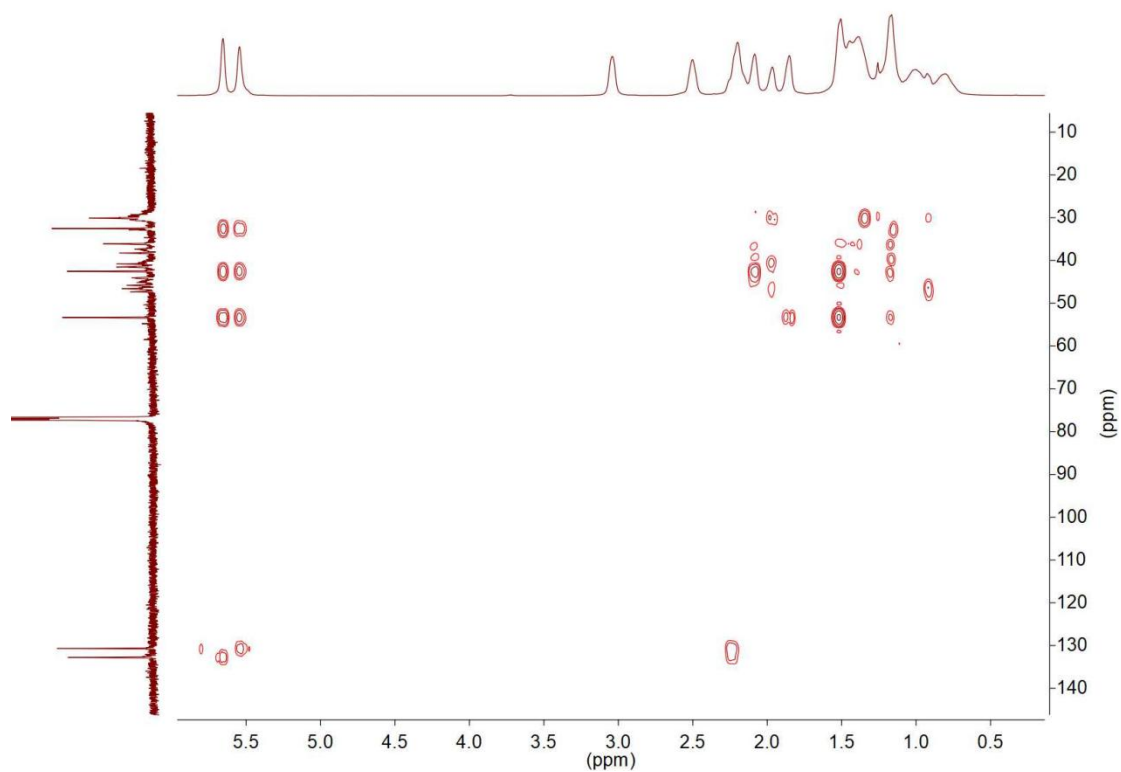

**Fig. S56**  $^1\text{H}$ - $^{13}\text{C}$  HMBC NMR spectrum of ethylene/norbornene/dicyclopentadiene terpolymer (Table 1, entry 15,  $\text{CDCl}_3$ , 25 °C, 500 MHz).

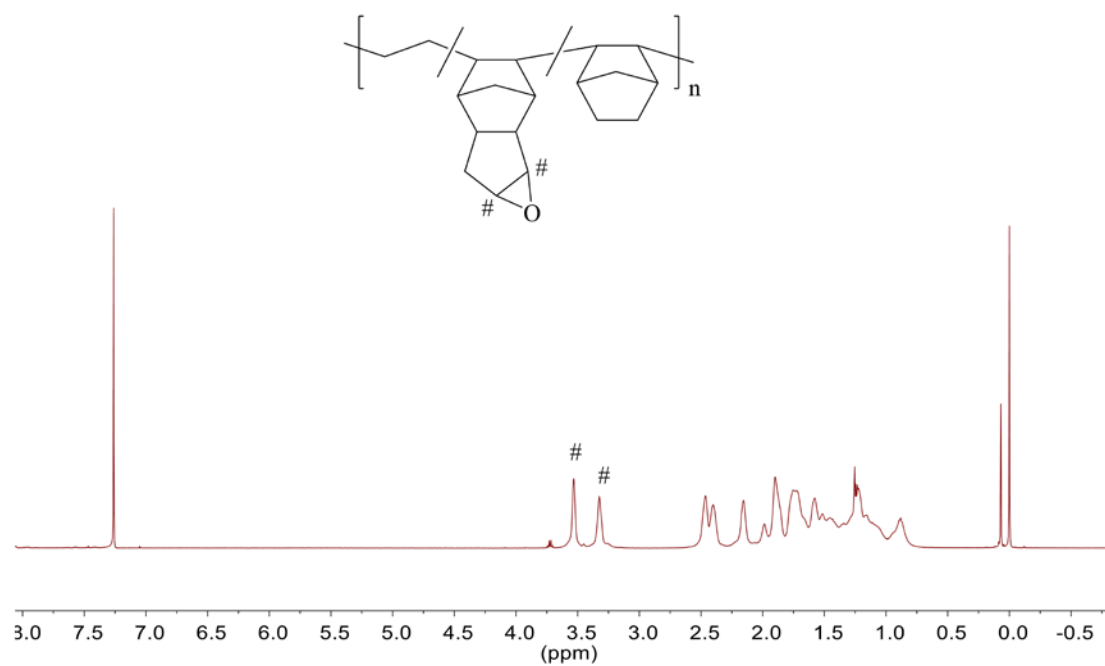

**Fig. S57**  $^1\text{H}$  spectrum of the product of ethylene/norbornene/dicyclopentadiene terpolymer (Table 1, entry 17) via epoxidation ( $\text{CDCl}_3$ , 25 °C, 500 MHz).



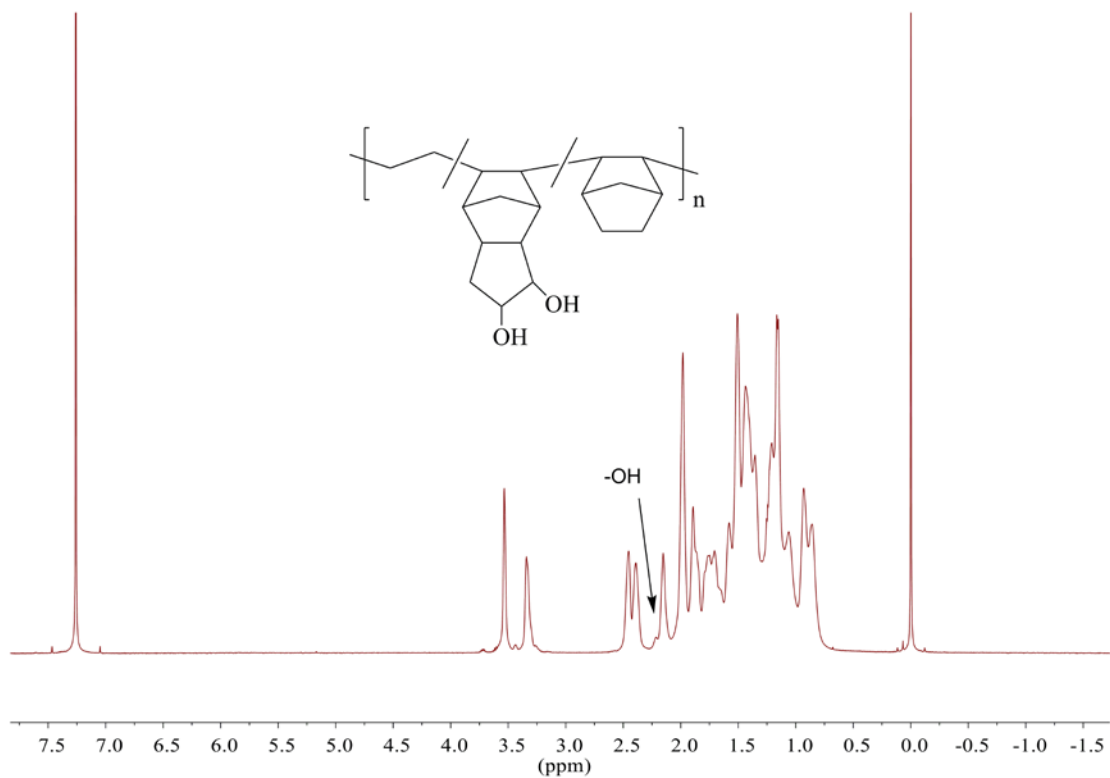

**Fig. S58**  $^1\text{H}$  spectrum of hydroxylated ethylene/norbornene/dicyclopentadiene terpolymer (Table 1, entry 17) ( $\text{CDCl}_3$ ,  $25^\circ\text{C}$ , 500 MHz).

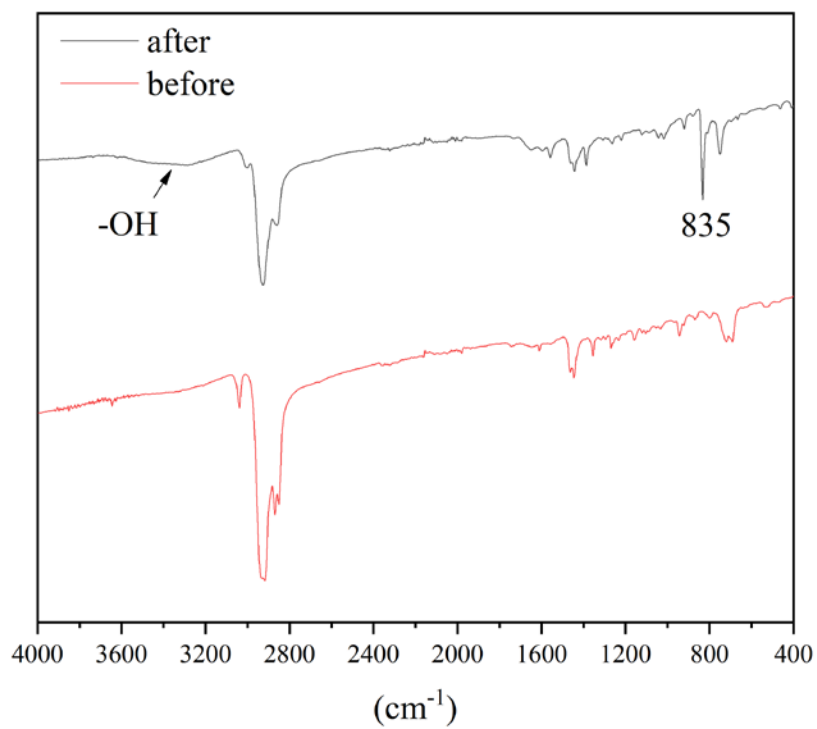

**Fig. S59** IR spectra of terpolymer (down, entry 17 in Table 1) and the corresponding hydroxylated product (up).

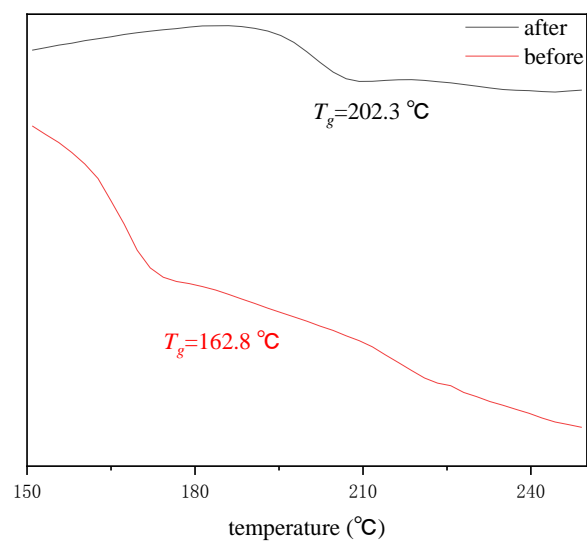

**Fig. S60** DSC curves of terpolymer (down, entry 17 in Table 1) and the corresponding hydroxylated product (up).

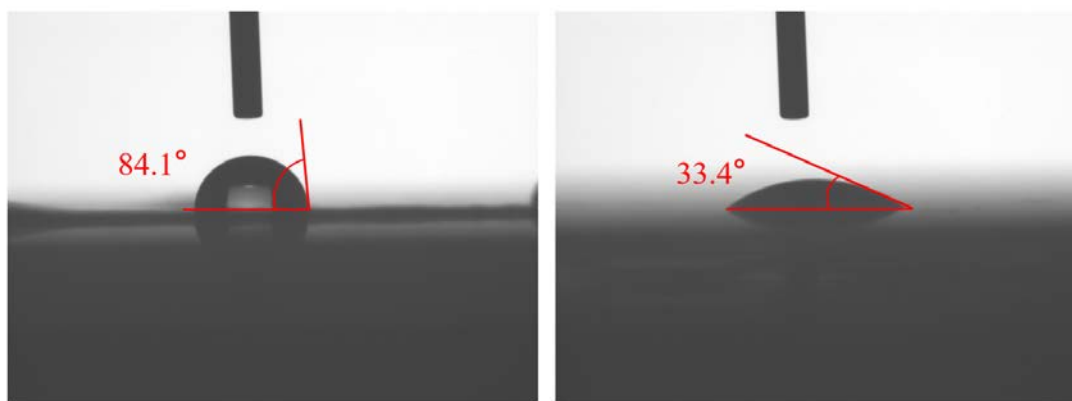

**Fig. S61** Water contact angle of terpolymer (left, entry 17 in Table 1) and the corresponding hydroxylated product (right).
